# Supplementary material for: Trans-Ethnic Fine-Mapping of Lipid Loci Identifies Population-Specific Signals and Allelic Heterogeneity That Increases the Trait Variance Explained
Source: PubMed Central journal article supplement (PMC3605054; doi:10.1371/journal.pgen.1003379), 2013-03-21
Supplement: pgen.1003379.s001.pdf [file pgen.1003379.s001.pdf]

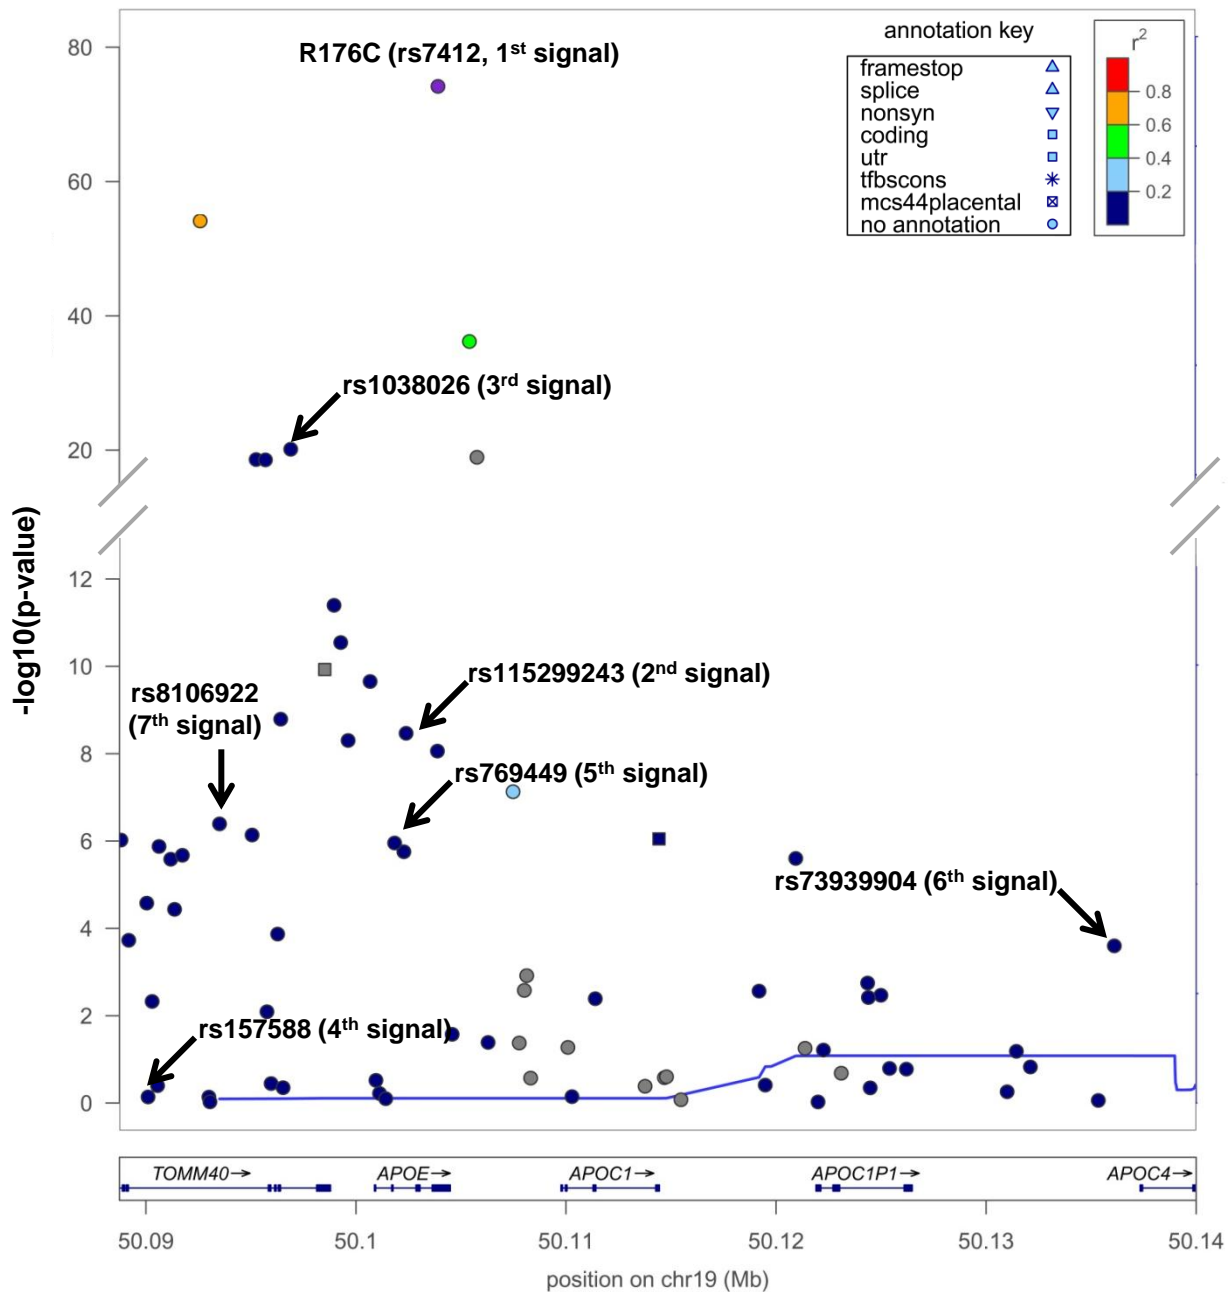

**Figure S1.** LDL-C locus *TOMM40-APOE-APOC4* exhibited seven signals in African Americans. Each SNP was colored according to its LD ( $r^2$ ) in PAGE consortium with the strongest SNP rs7412 (R176C) colored in purple.
