# Supplementary material for: Trans-Ethnic Fine-Mapping of Lipid Loci Identifies Population-Specific Signals and Allelic Heterogeneity That Increases the Trait Variance Explained
Source: PubMed Central journal article supplement (PMC3605054; doi:10.1371/journal.pgen.1003379), 2013-03-21
Supplement: pgen.1003379.s002.pdf [file pgen.1003379.s002.pdf]

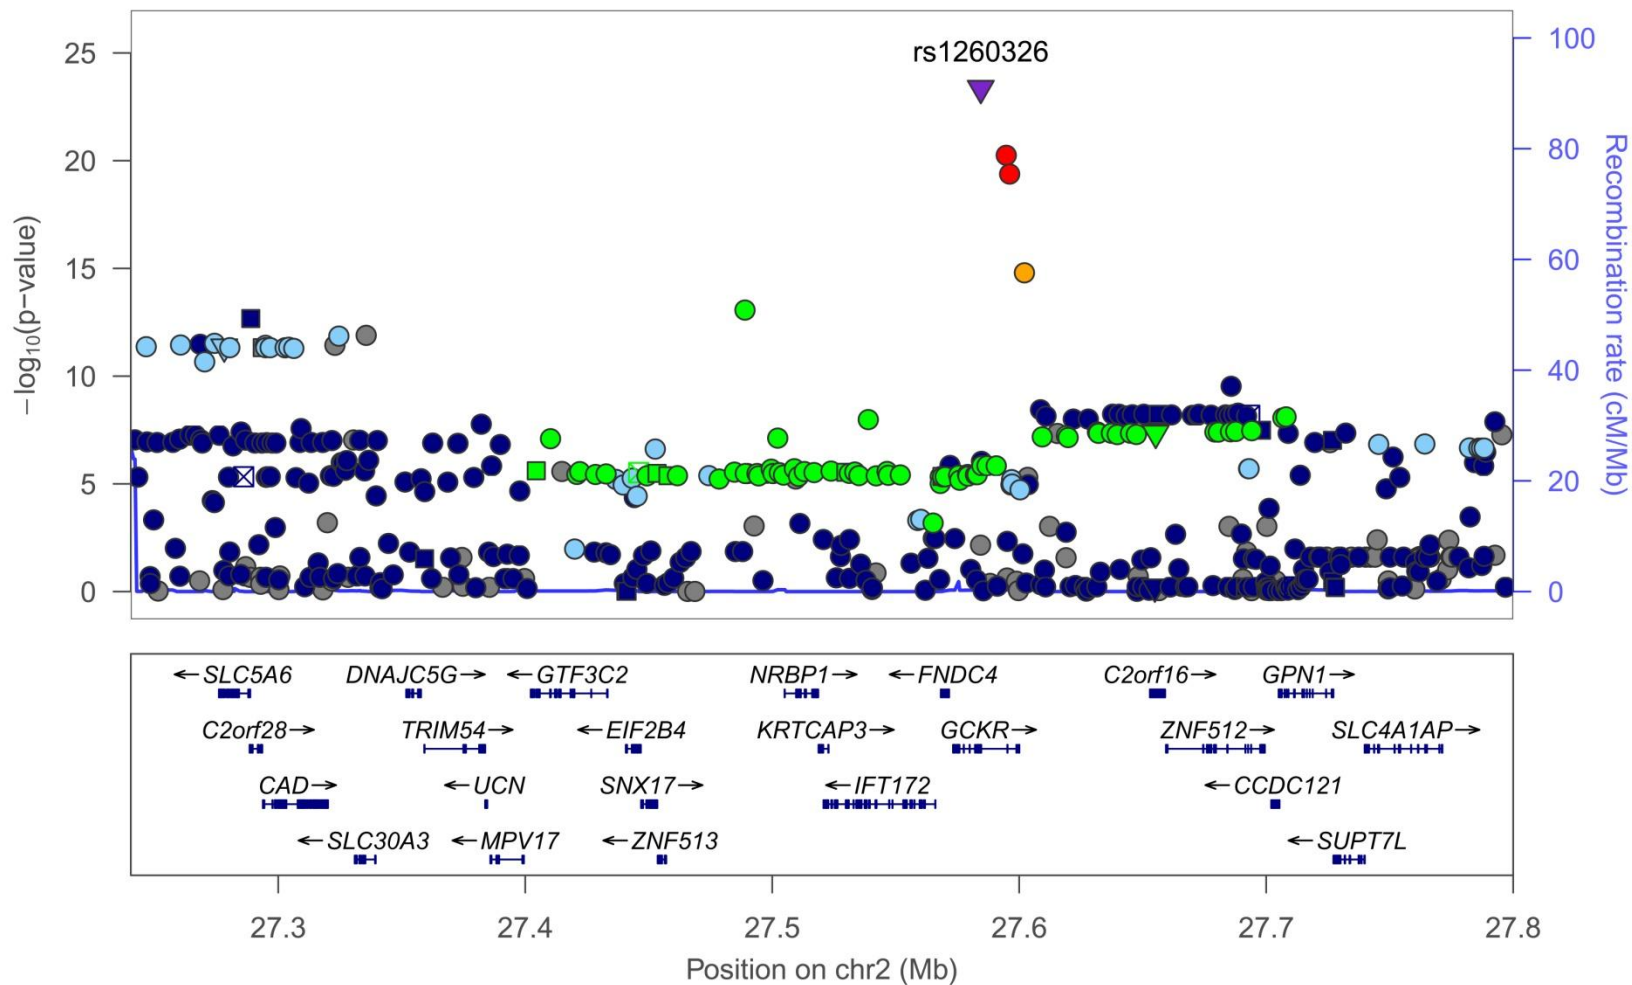

**Figure S2A.** Association at TG locus *GCKR* in Europeans. Index SNP rs1260326 (P446L) is the variant showing the strongest evidence of association in trans-ethnic meta-analysis.

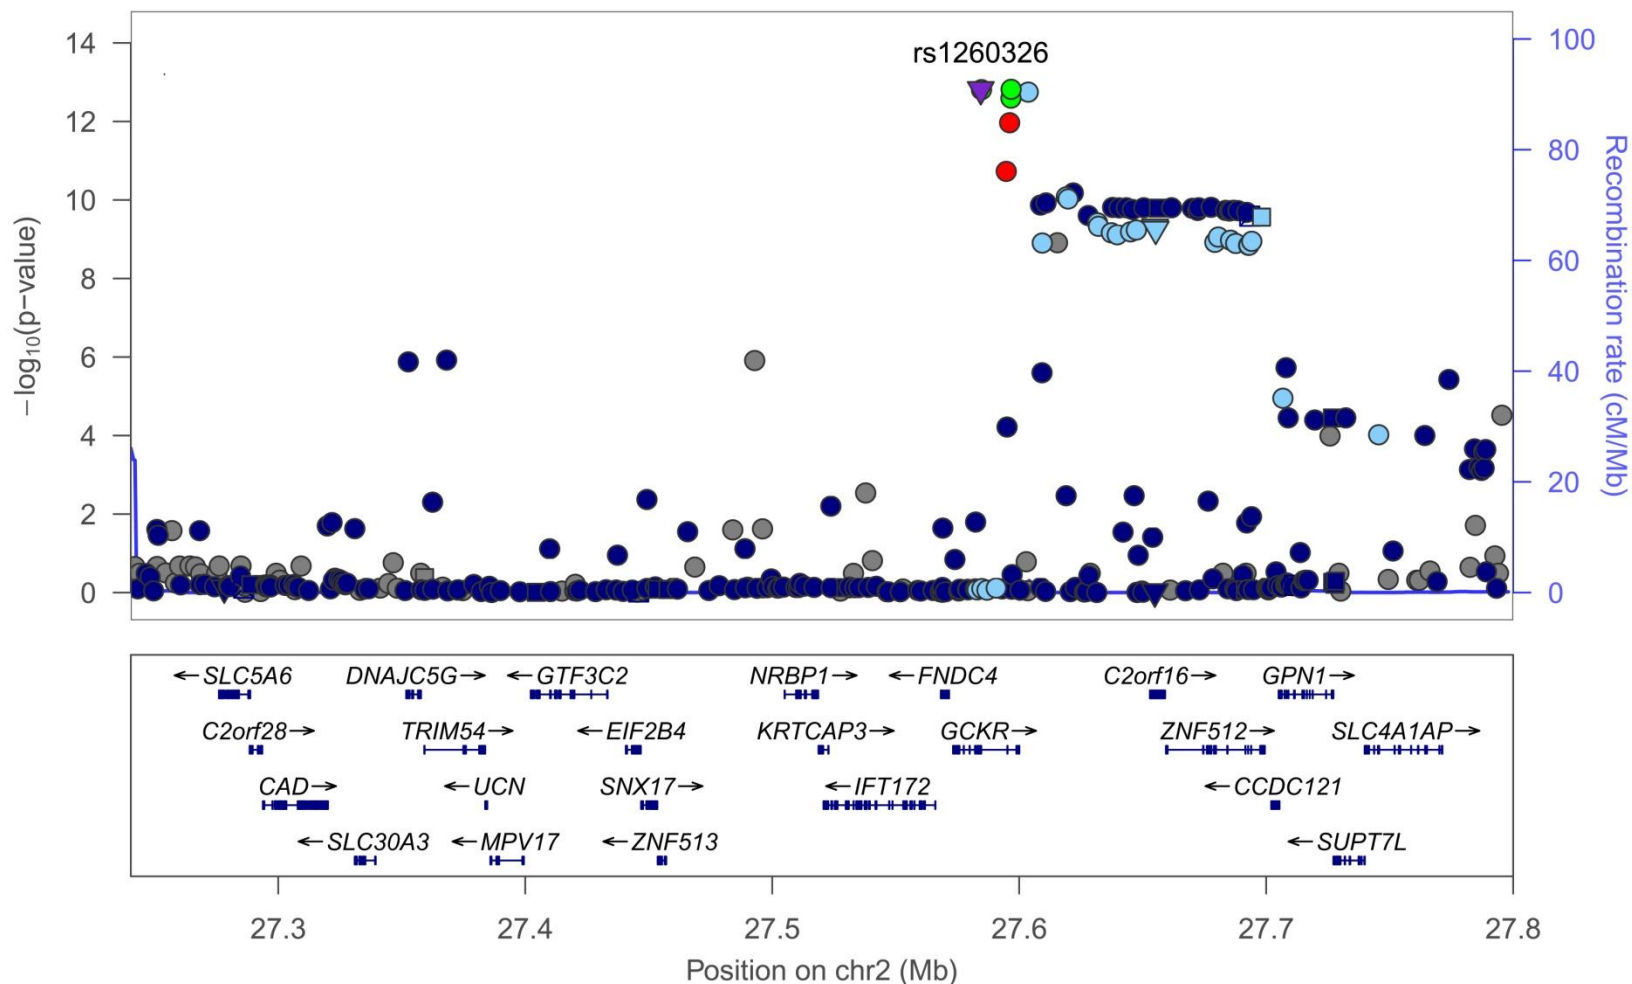

**Figure S2B.** Association at TG locus GCKR in East Asians. Index SNP rs1260326 (P446L) is the variant showing the strongest evidence of association in trans-ethnic meta-analysis.

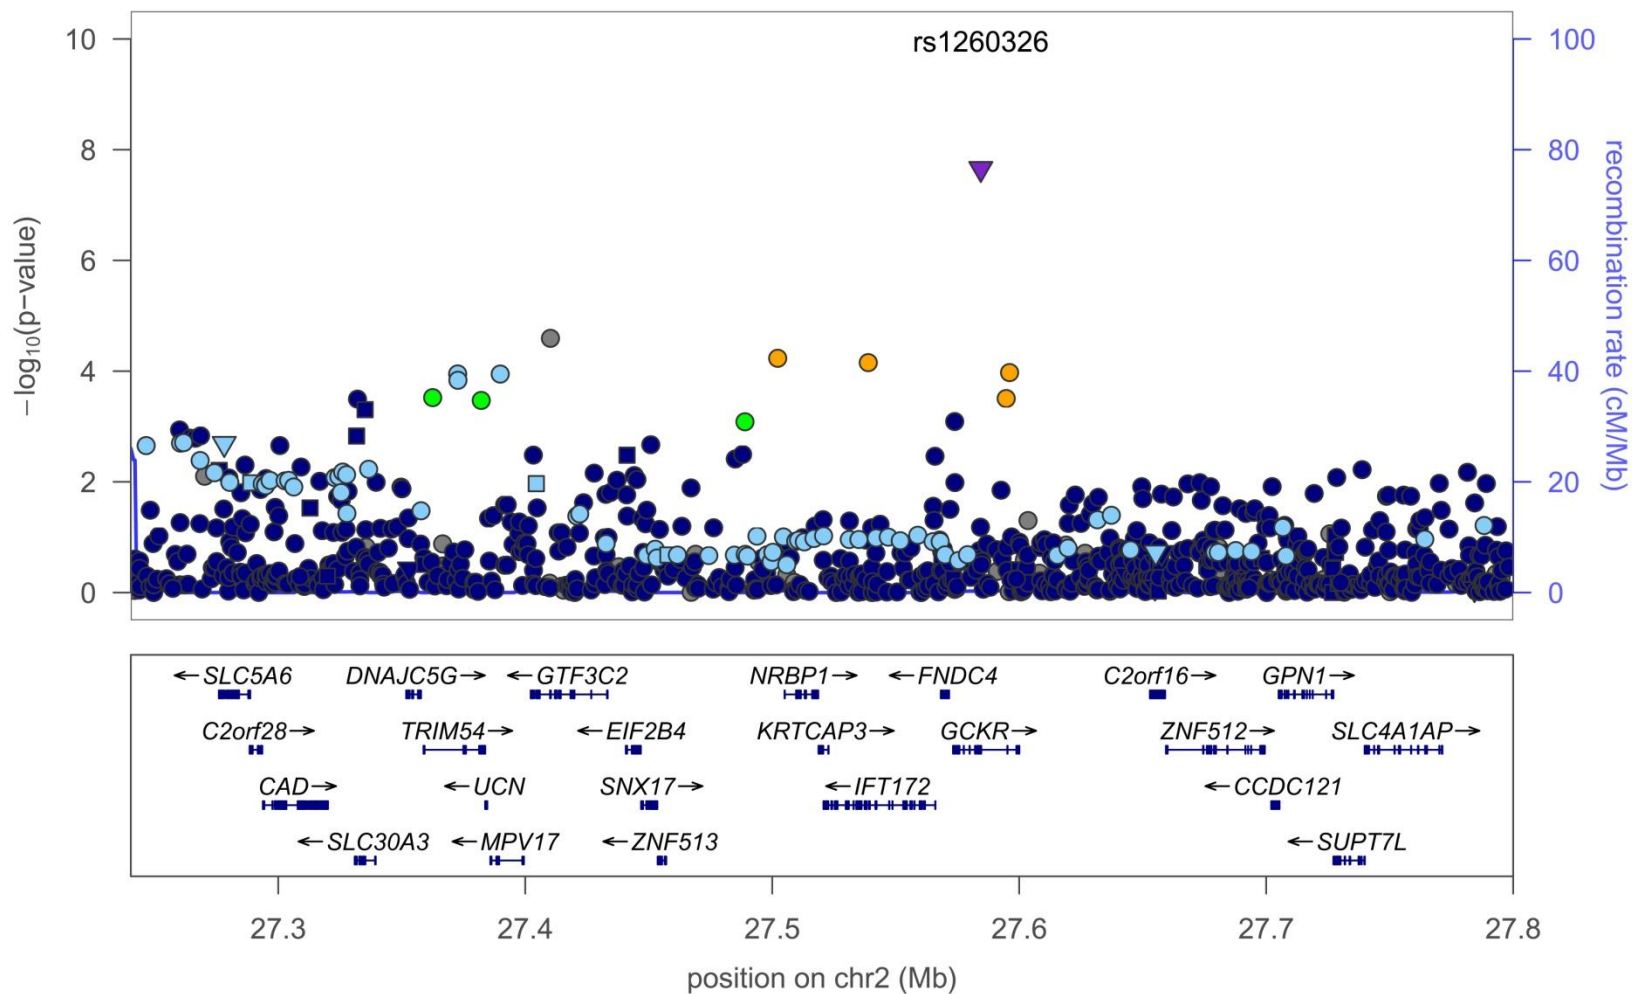

**Figure S2C.** Association at TG locus GCKR in African Americans. Index SNP rs1260326 (P446L) is the variant showing the strongest evidence of association in trans-ethnic meta-analysis.

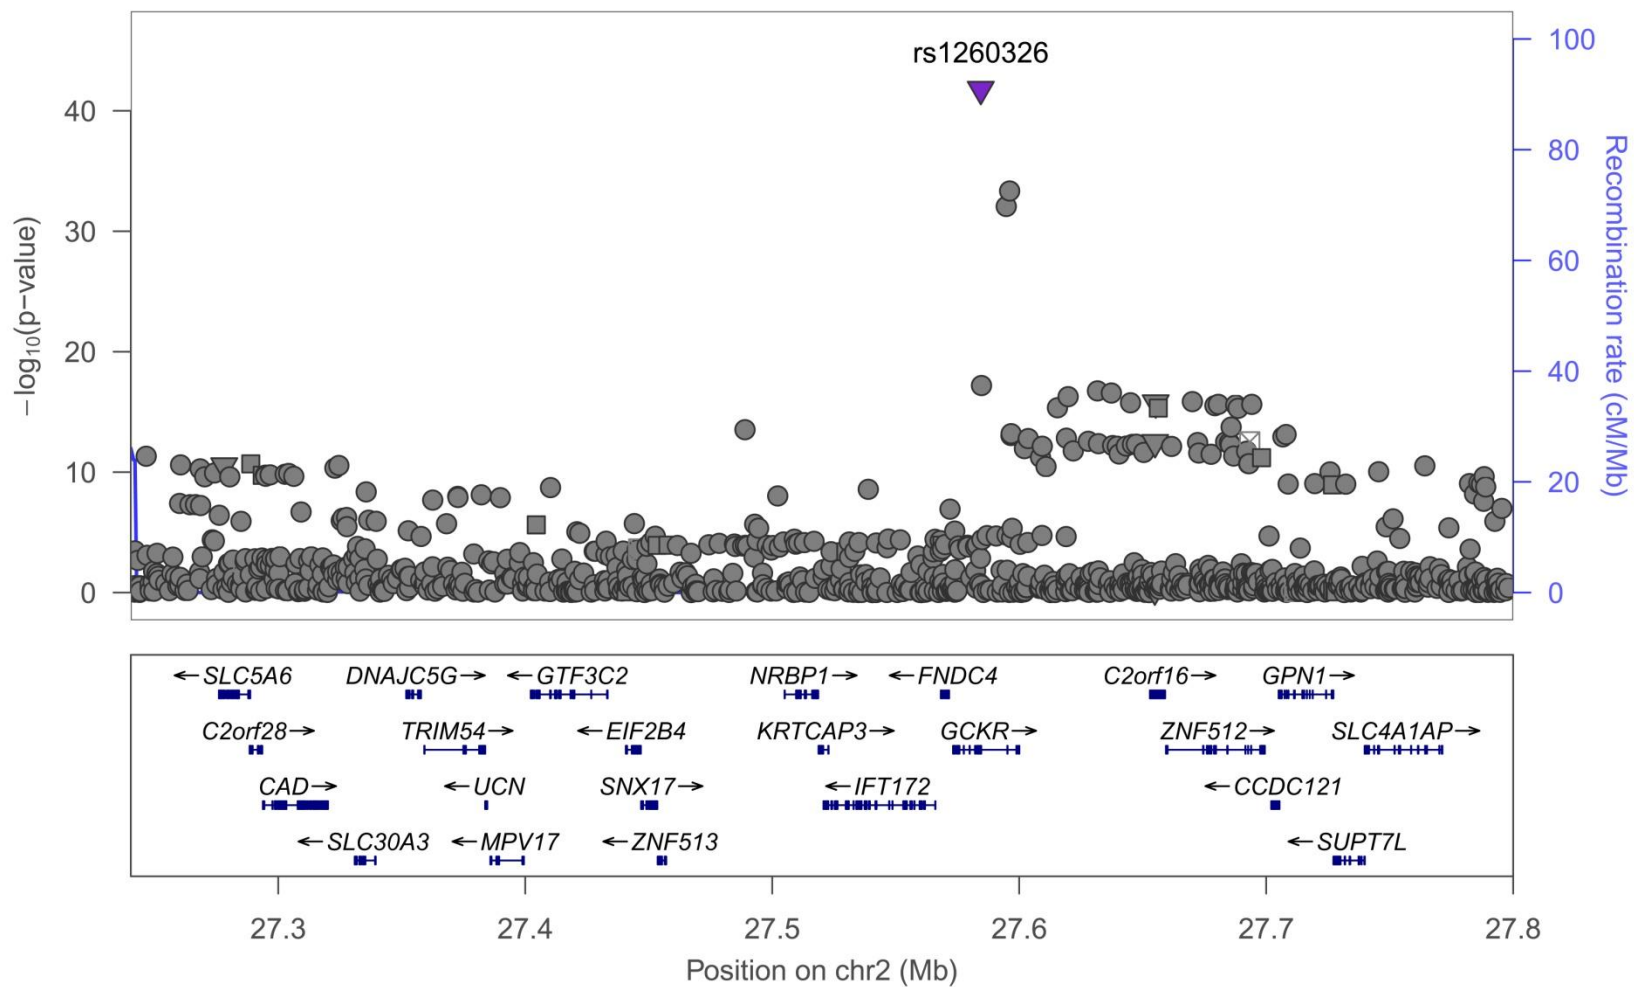

**Figure S2D.** Association at TG locus *GCKR* in trans-ethnic meta-analysis.
