# Supplementary material for: Trans-Ethnic Fine-Mapping of Lipid Loci Identifies Population-Specific Signals and Allelic Heterogeneity That Increases the Trait Variance Explained
Source: PubMed Central journal article supplement (PMC3605054; doi:10.1371/journal.pgen.1003379), 2013-03-21
Supplement: pgen.1003379.s004.pdf [file pgen.1003379.s004.pdf]

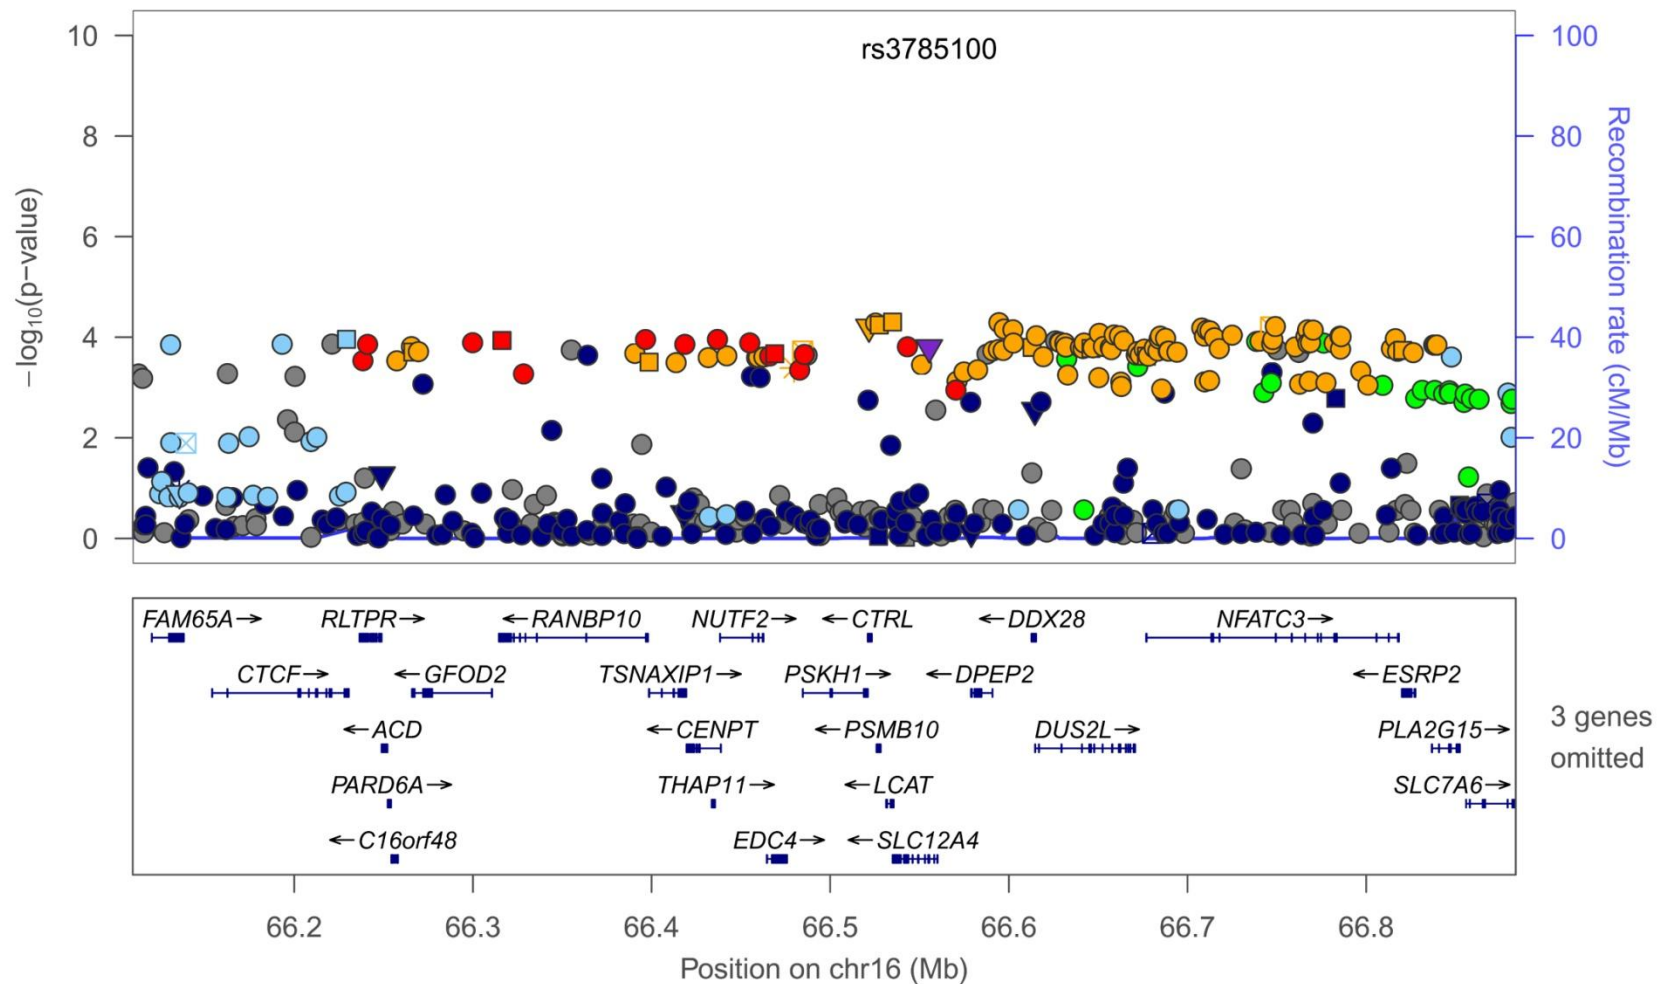

**Figure S4A.** Association at HDL-C locus *LCAT* in Europeans. Index SNP rs3785100 (*SLC12A4*-E4G) is the variant showing the strongest evidence of association in trans-ethnic meta-analysis.

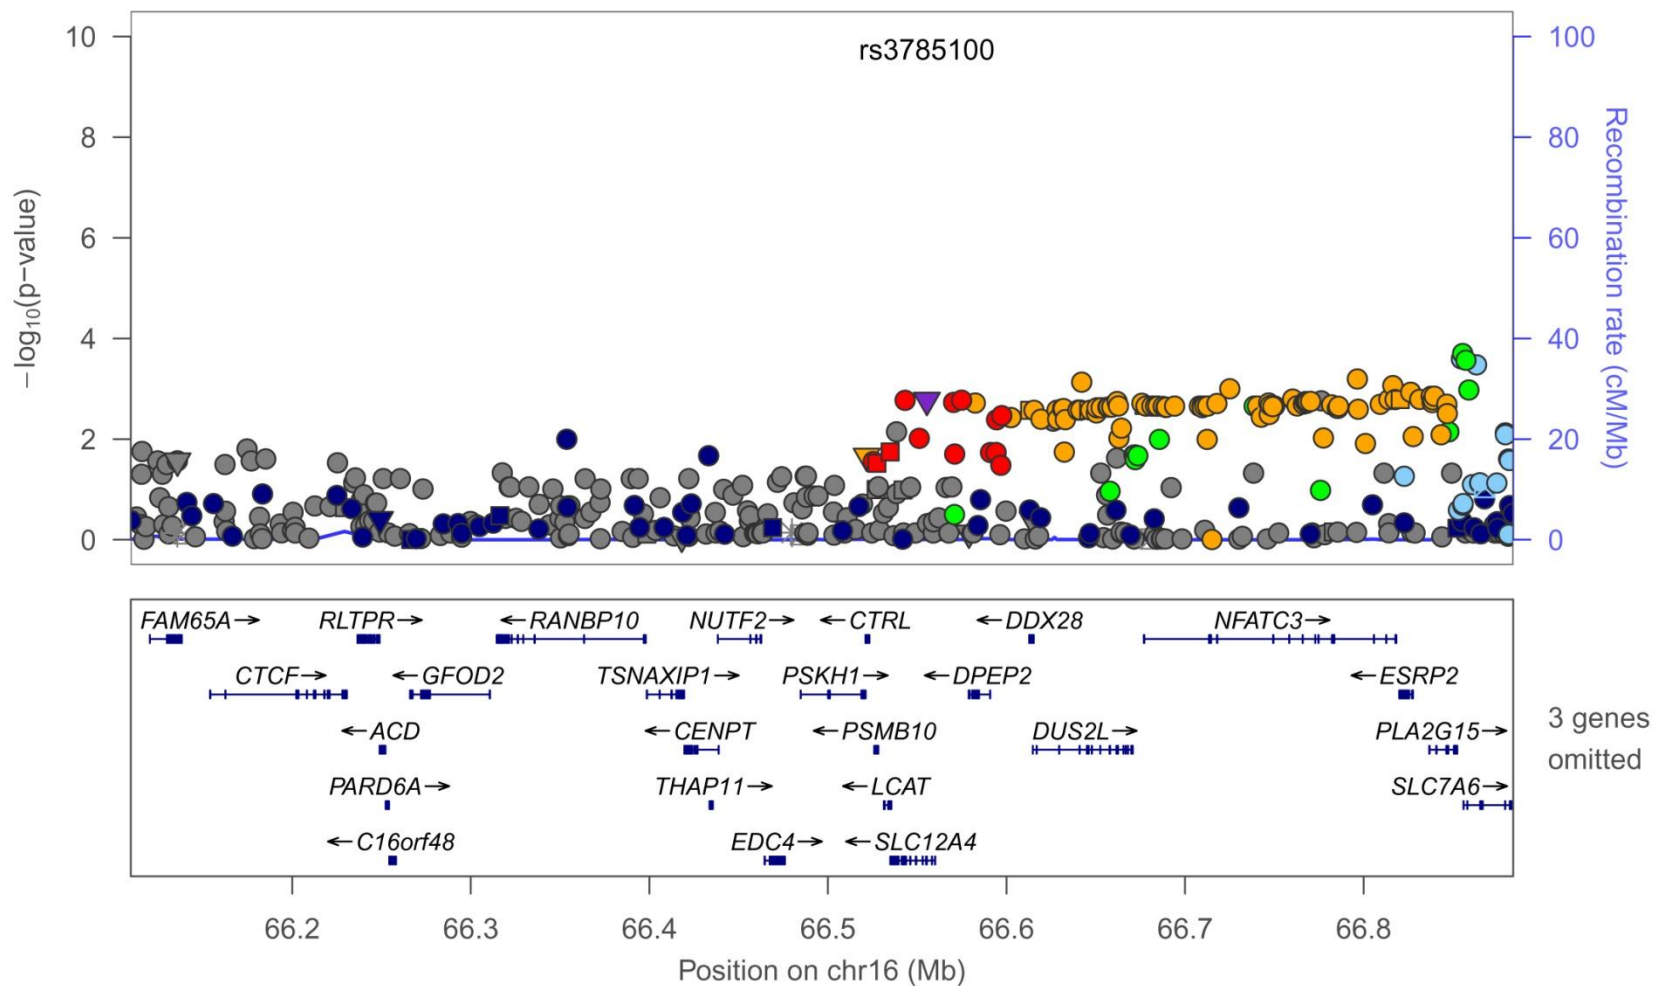

**Figure S4B.** Association at HDL-C locus *LCAT* in East Asians. Index SNP rs3785100 (*SLC12A4*-E4G) is the variant showing the strongest evidence of association in trans-ethnic meta-analysis.

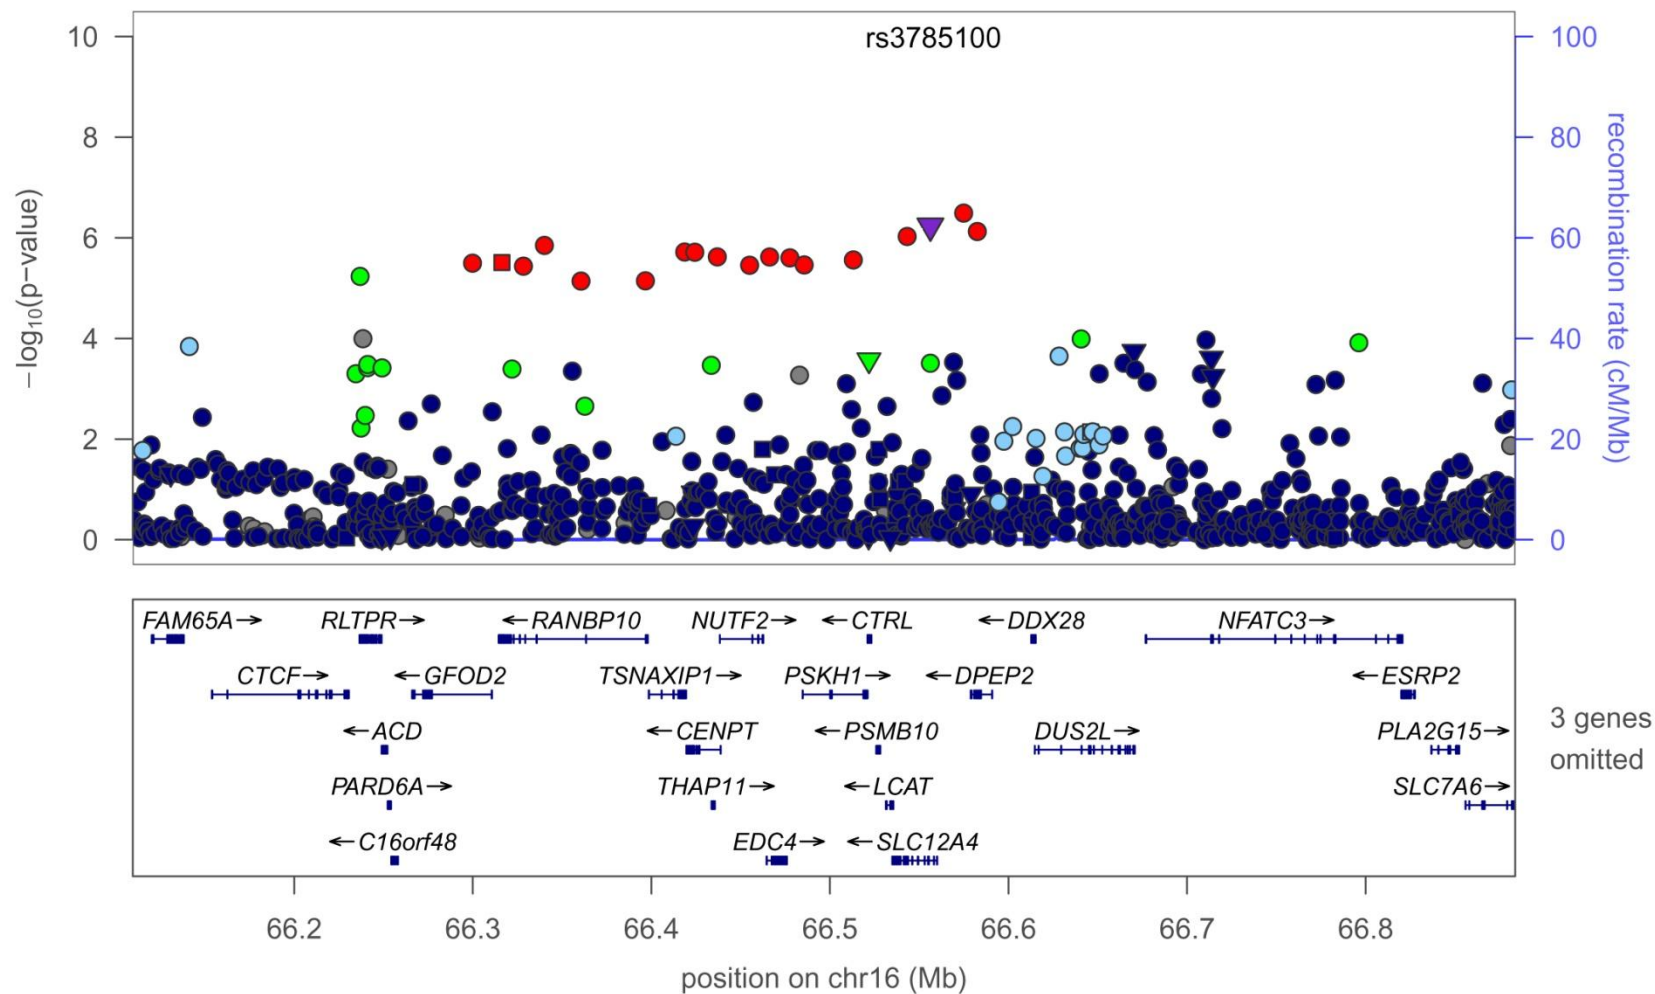

**Figure S4C.** Association at HDL-C locus *LCAT* in African Americans. Index SNP rs3785100 (*SLC12A4*-E4G) is the variant showing the strongest evidence of association in trans-ethnic meta-analysis.

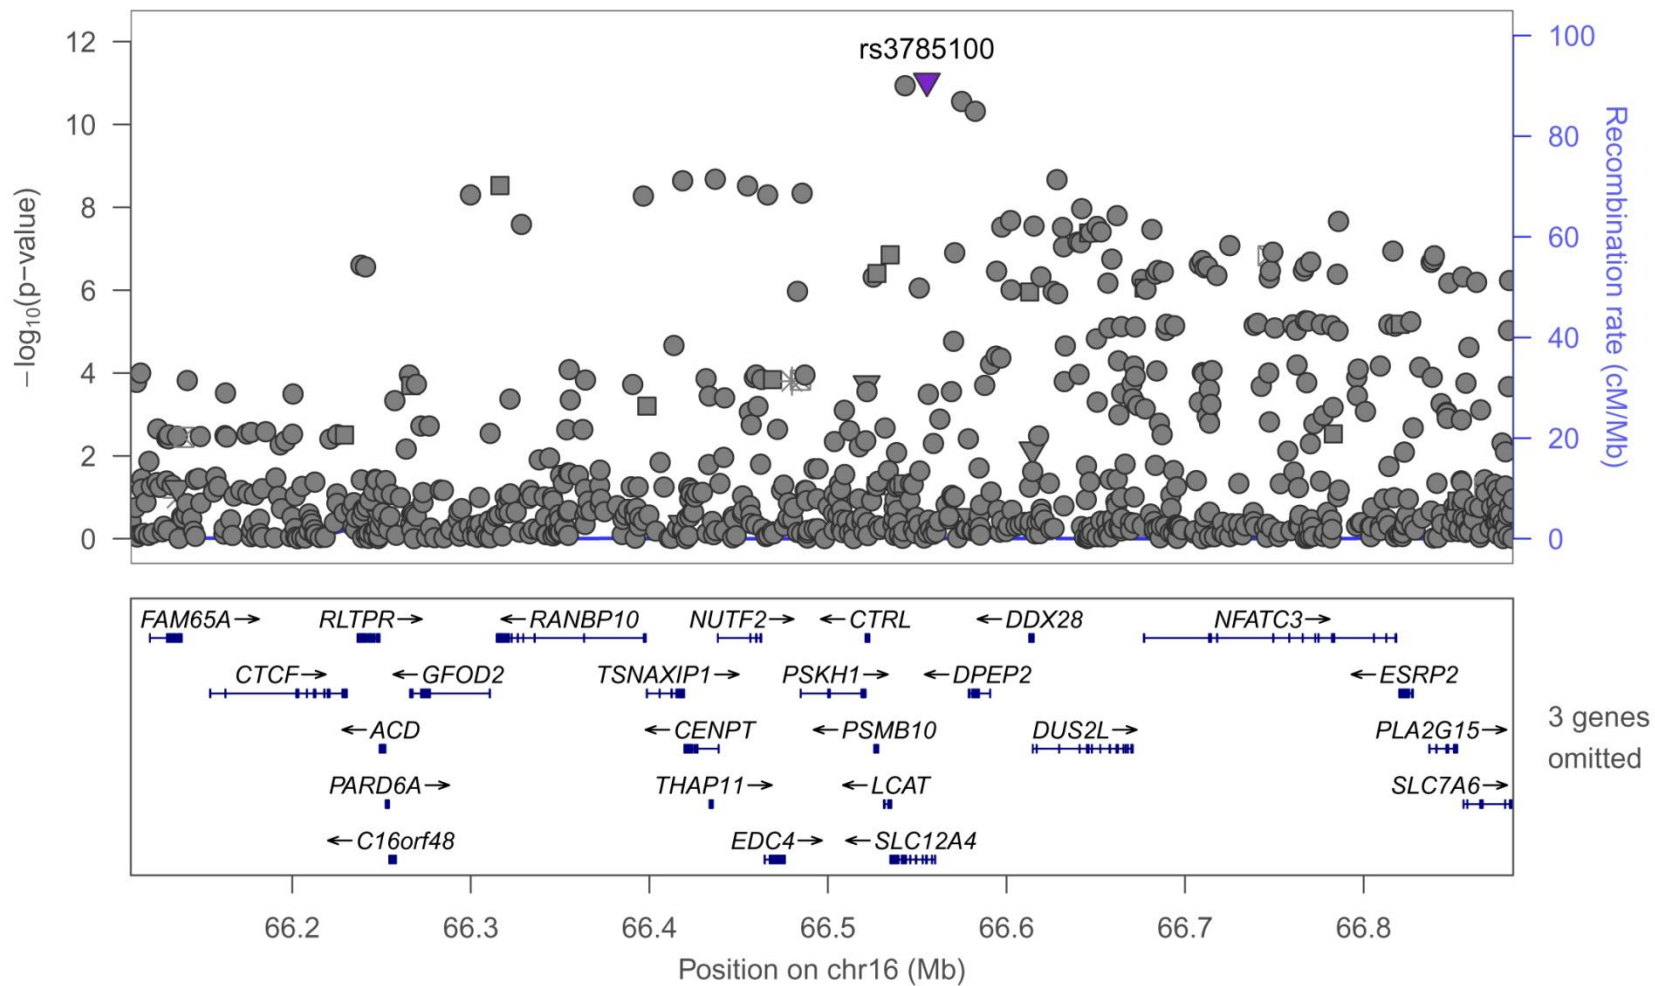

**Figure S4D.** Association at HDL-C locus *LCAT* in trans-ethnic meta-analysis.
