# Supplementary material for: Trans-Ethnic Fine-Mapping of Lipid Loci Identifies Population-Specific Signals and Allelic Heterogeneity That Increases the Trait Variance Explained
Source: PubMed Central journal article supplement (PMC3605054; doi:10.1371/journal.pgen.1003379), 2013-03-21
Supplement: pgen.1003379.s005.pdf [file pgen.1003379.s005.pdf]

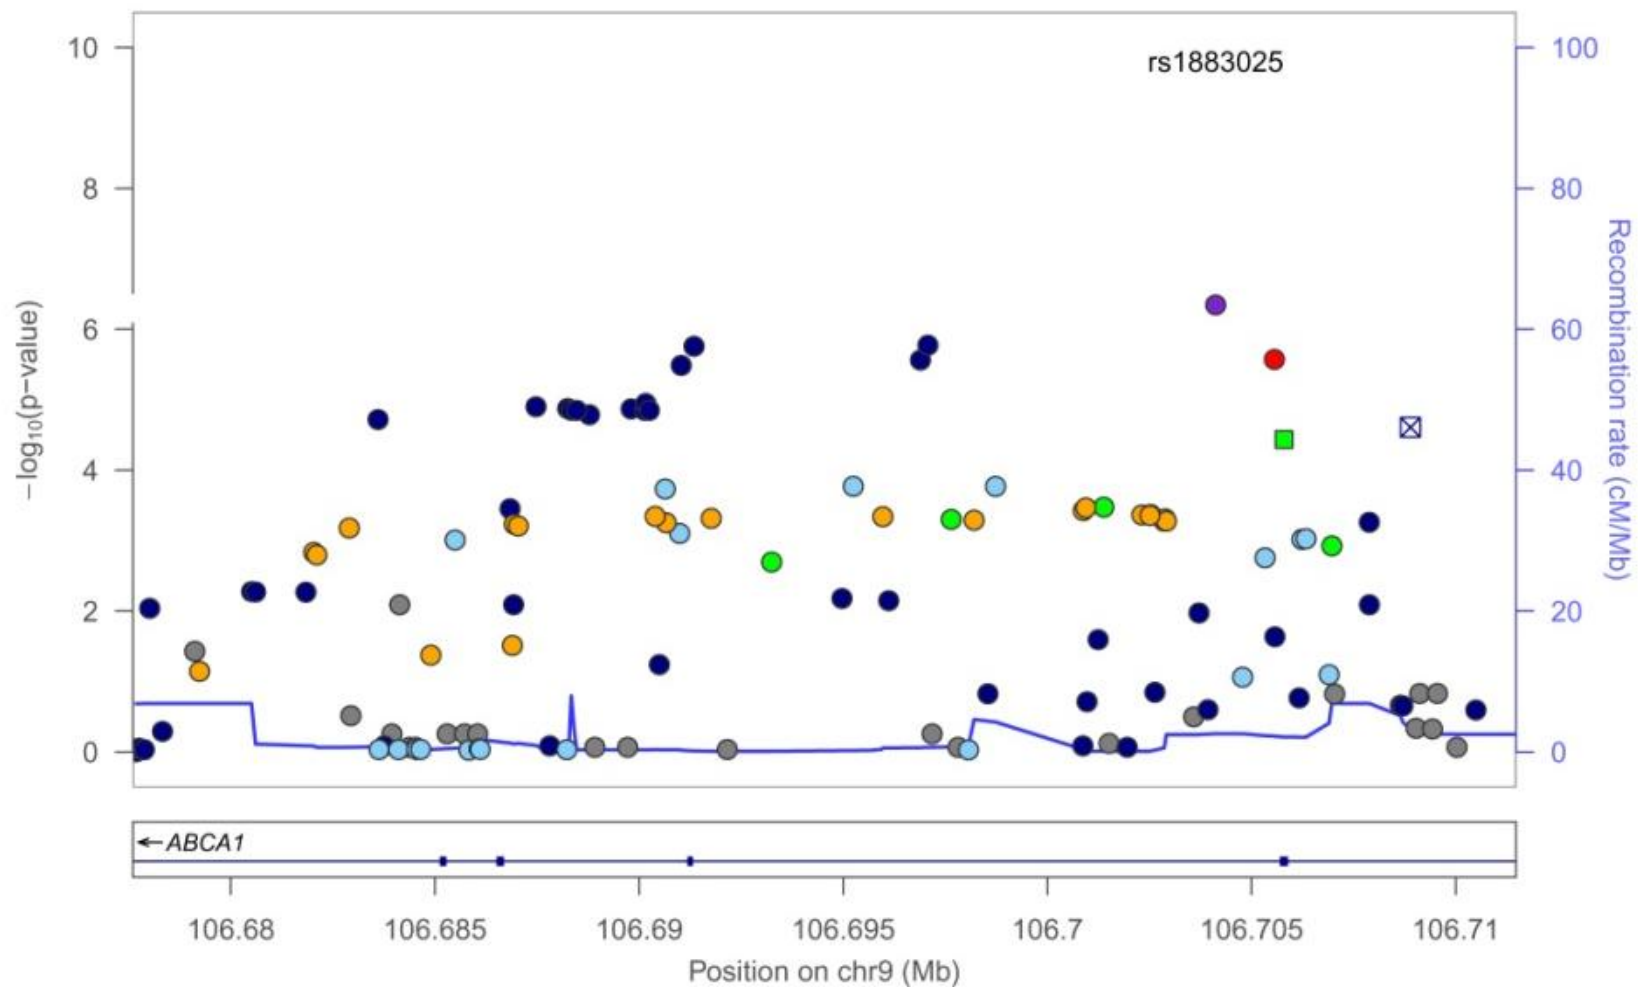

**Figure S5A.** Association at HDL-C locus *ABCA1* in Europeans. Index SNP rs1883025 is the variant showing the strongest evidence of association in trans-ethnic meta-analysis.

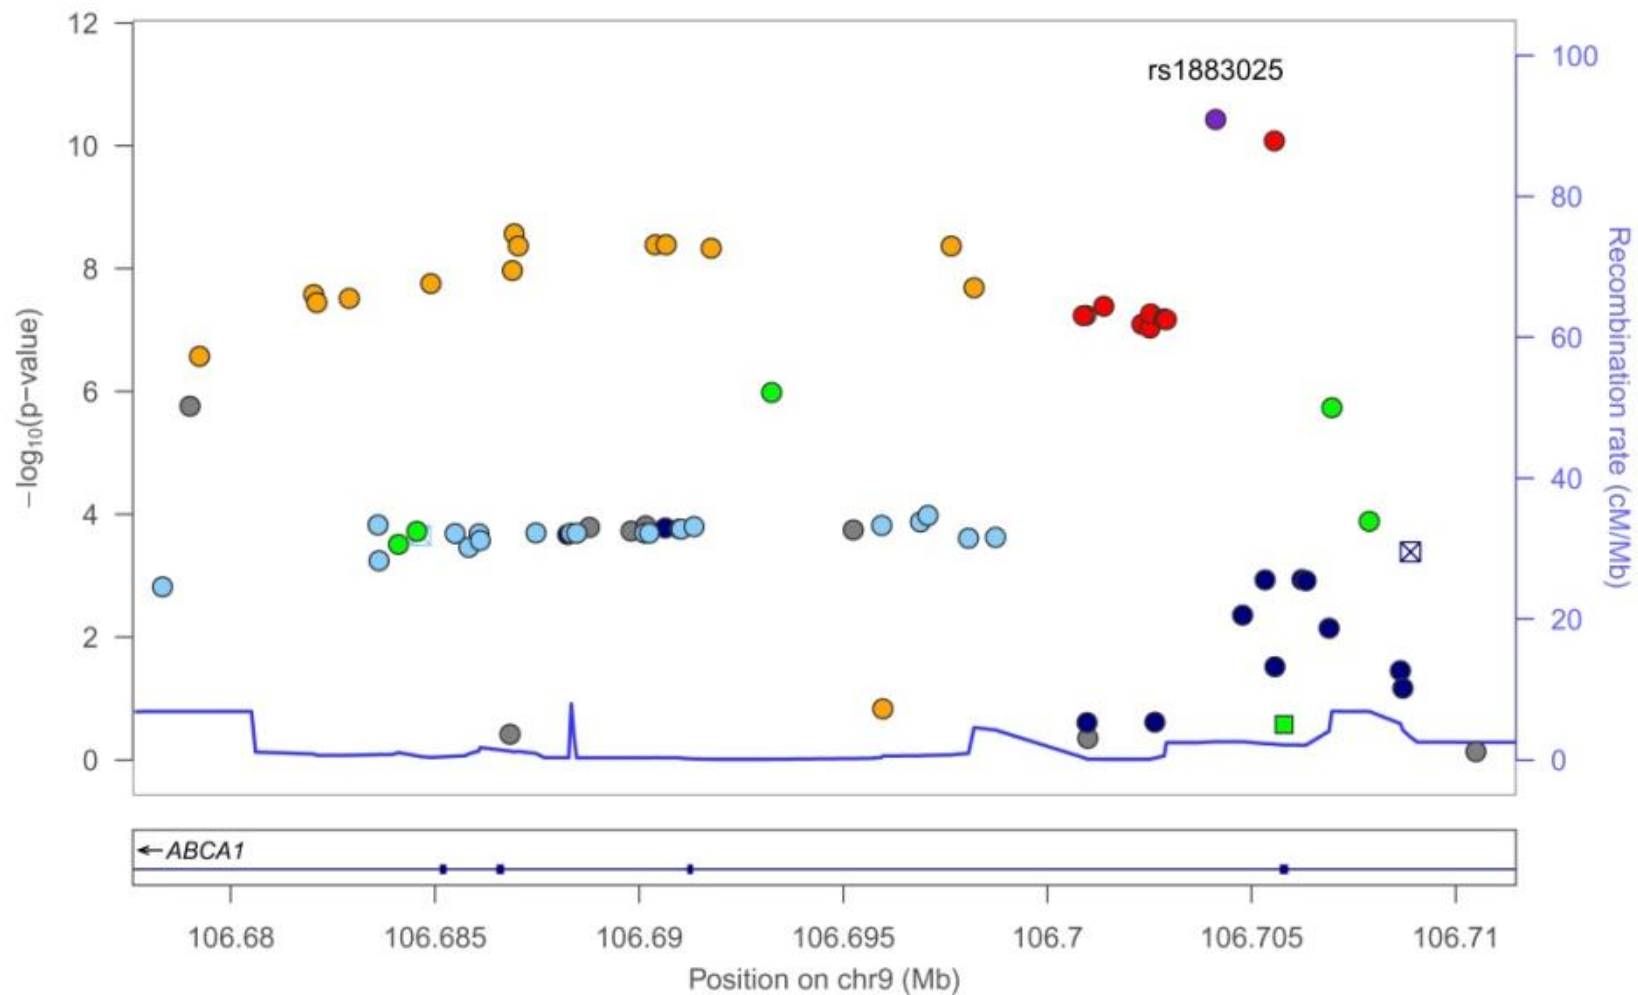

**Figure S5B.** Association at HDL-C locus *ABCA1* in East Asians. Index SNP rs1883025 is the variant showing the strongest evidence of association in trans-ethnic meta-analysis.

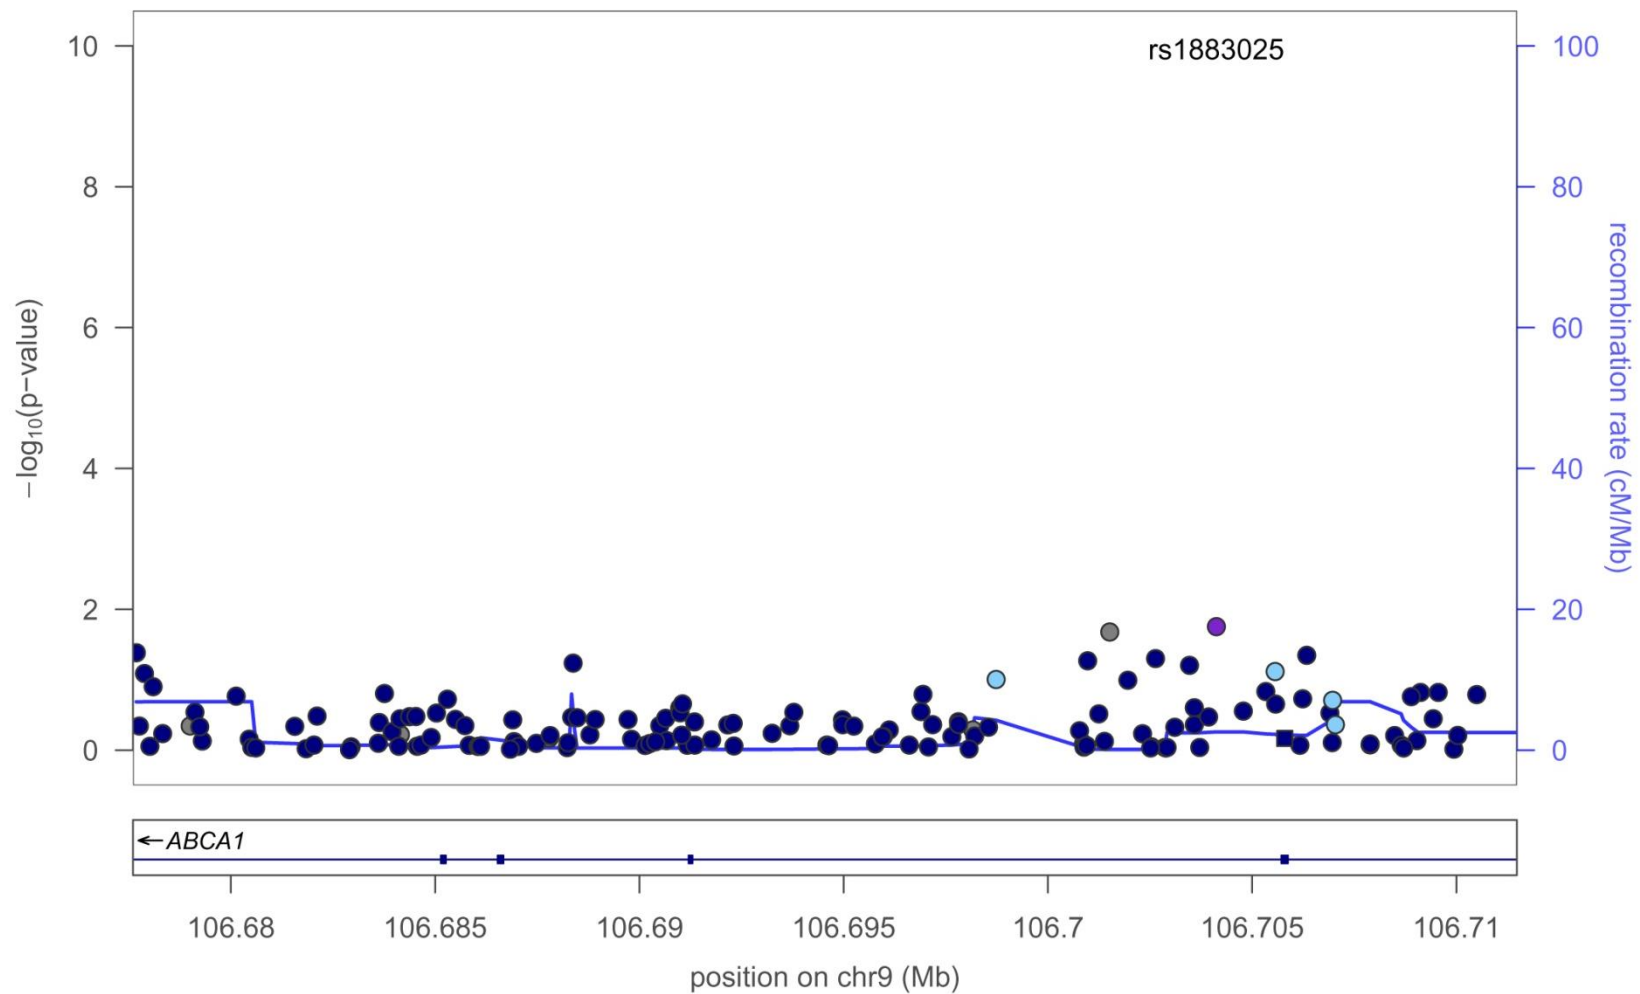

**Figure S5C.** Association at HDL-C locus *ABCA1* in African Americans. Index SNP rs1883025 is the variant showing the strongest evidence of association in trans-ethnic meta-analysis.

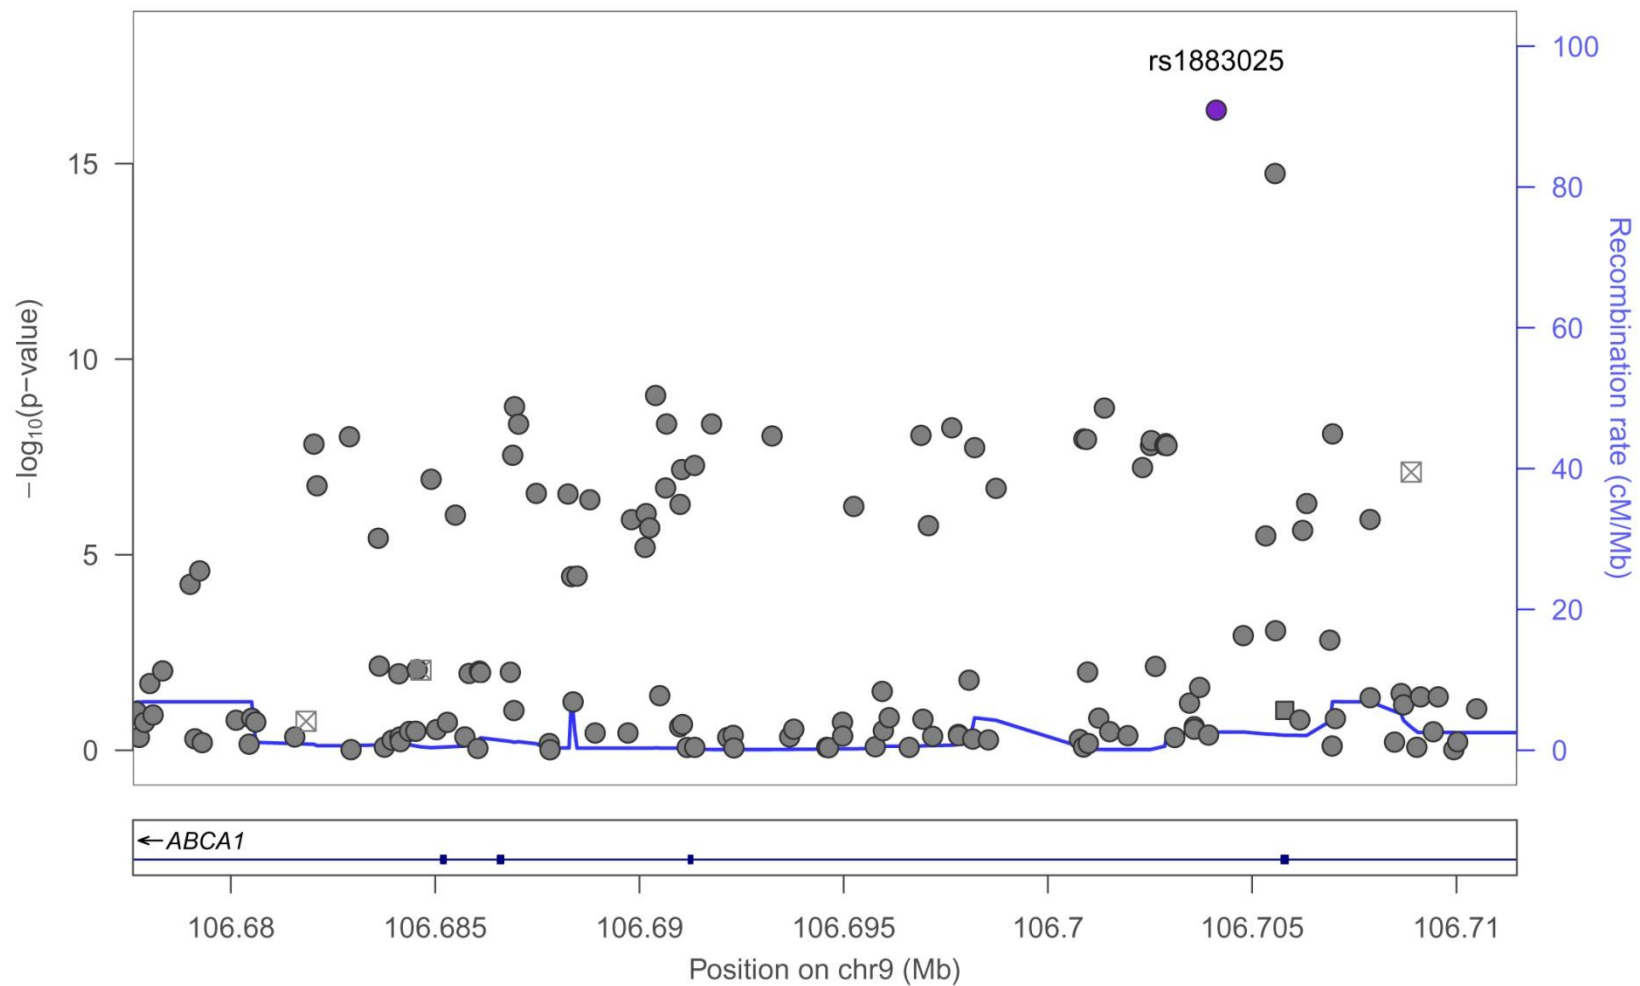

**Figure S5D.** Association at HDL-C locus *ABCA1* in trans-ethnic meta-analysis.
