# Supplementary material for: Trans-Ethnic Fine-Mapping of Lipid Loci Identifies Population-Specific Signals and Allelic Heterogeneity That Increases the Trait Variance Explained
Source: PubMed Central journal article supplement (PMC3605054; doi:10.1371/journal.pgen.1003379), 2013-03-21
Supplement: pgen.1003379.s006.pdf [file pgen.1003379.s006.pdf]

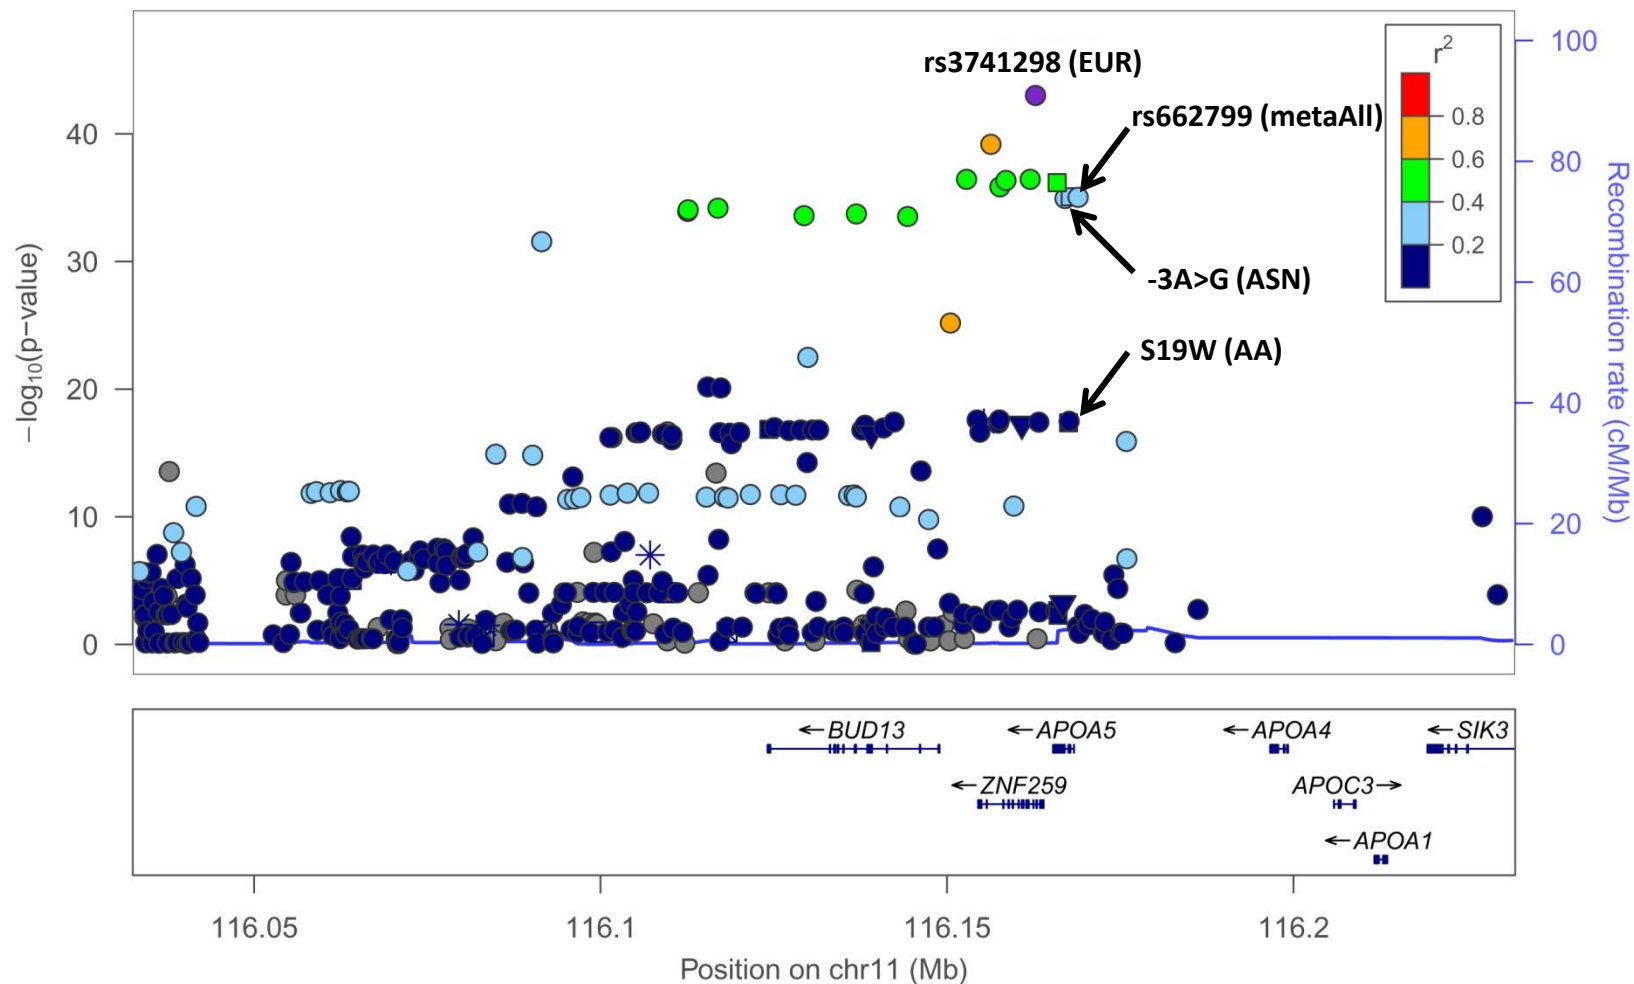

**FigureS6A.** Association at TG locus *APOA5* in Europeans. Index SNP rs3741298 is the variant showing the strongest evidence of association in Europeans. The SNPs with the smallest  $P$  values in East Asians (-3A>G), African Americans (S19W) and the trans-ethnic meta-analysis (rs662799) are also indicated.

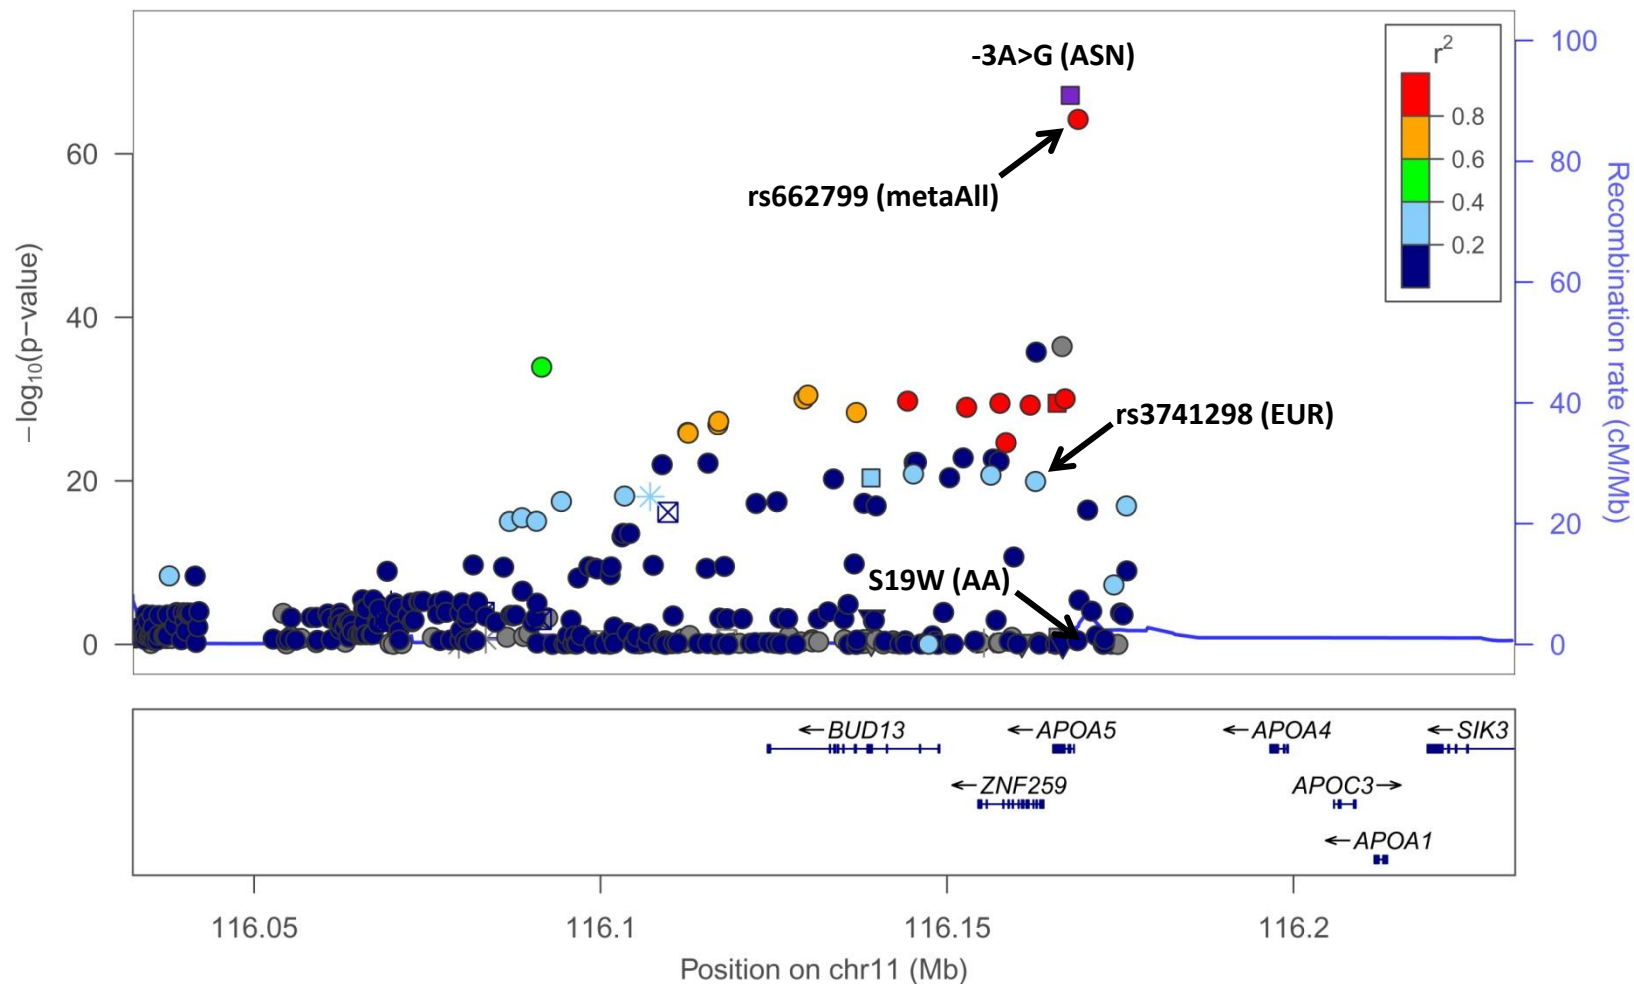

**FigureS6B.** Association at TG locus *APOA5* in East Asians. Index SNP -3A>G is the variant showing the strongest evidence of association in East Asians. The SNPs with the smallest  $P$  values in Europeans (rs3741298), African Americans (S19W) and the trans-ethnic meta-analysis (rs662799) are also indicated.

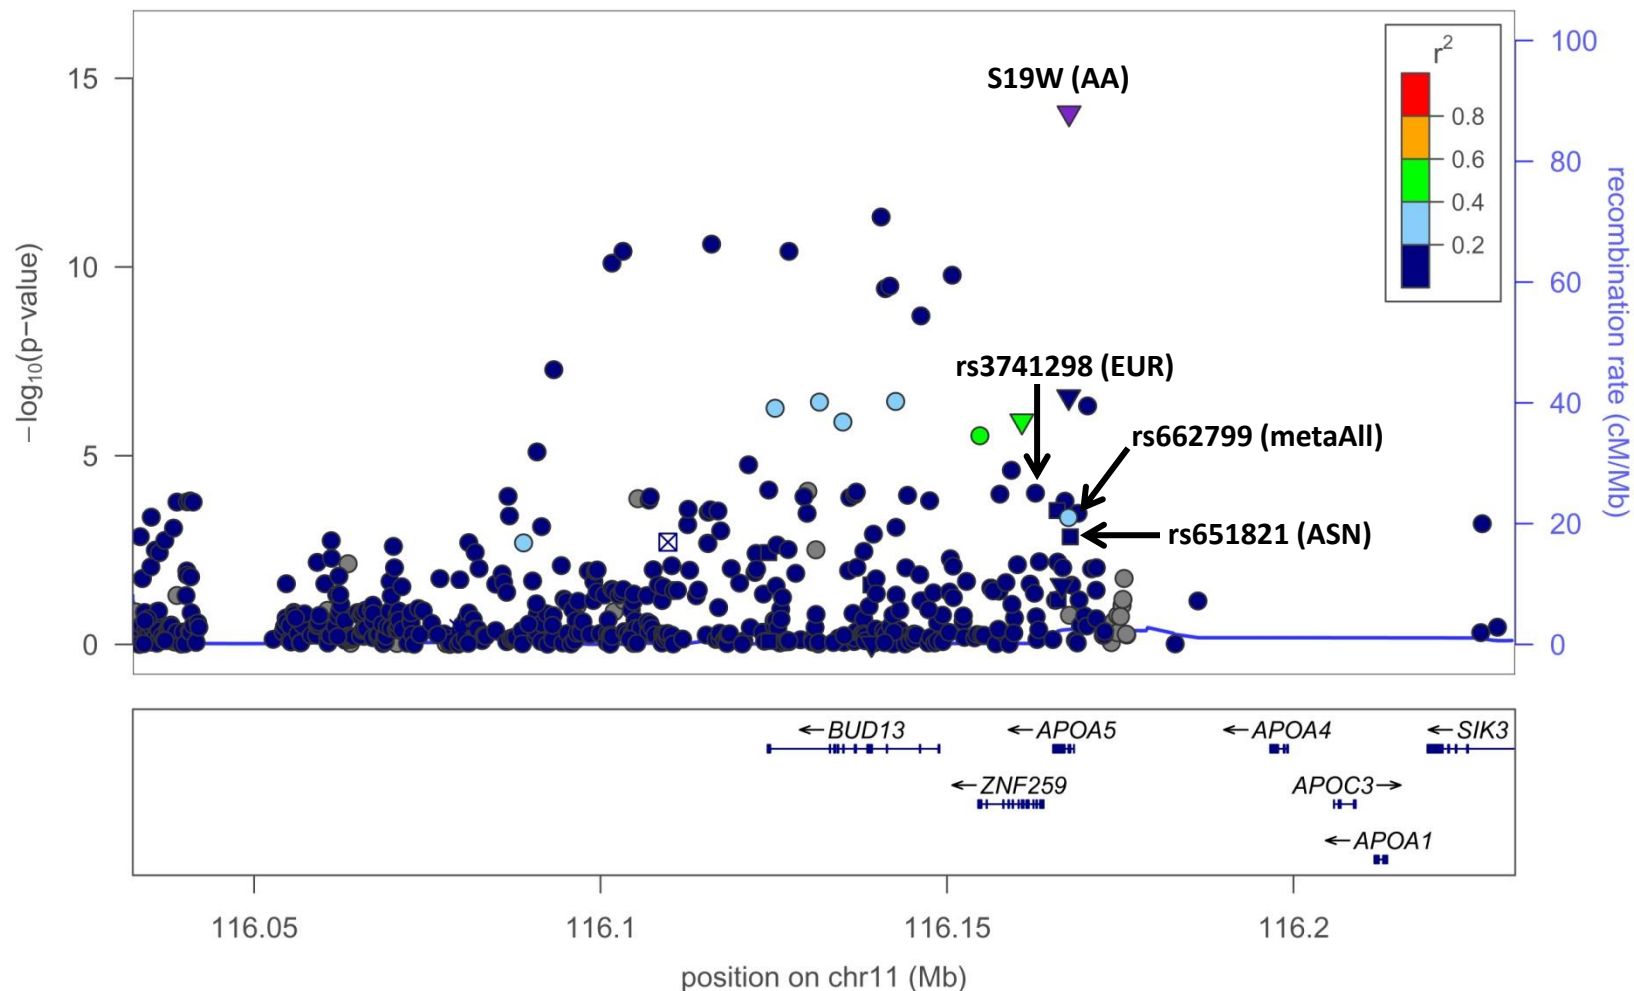

**FigureS6C.** Association at TG locus *APOA5* in African Americans. Index SNP S19W is the variant showing the strongest evidence of association in African Americans. The SNPs with the smallest  $P$  values in Europeans (rs3741298), East Asians (-3A>G) and the trans-ethnic meta-analysis (rs662799) are also indicated.

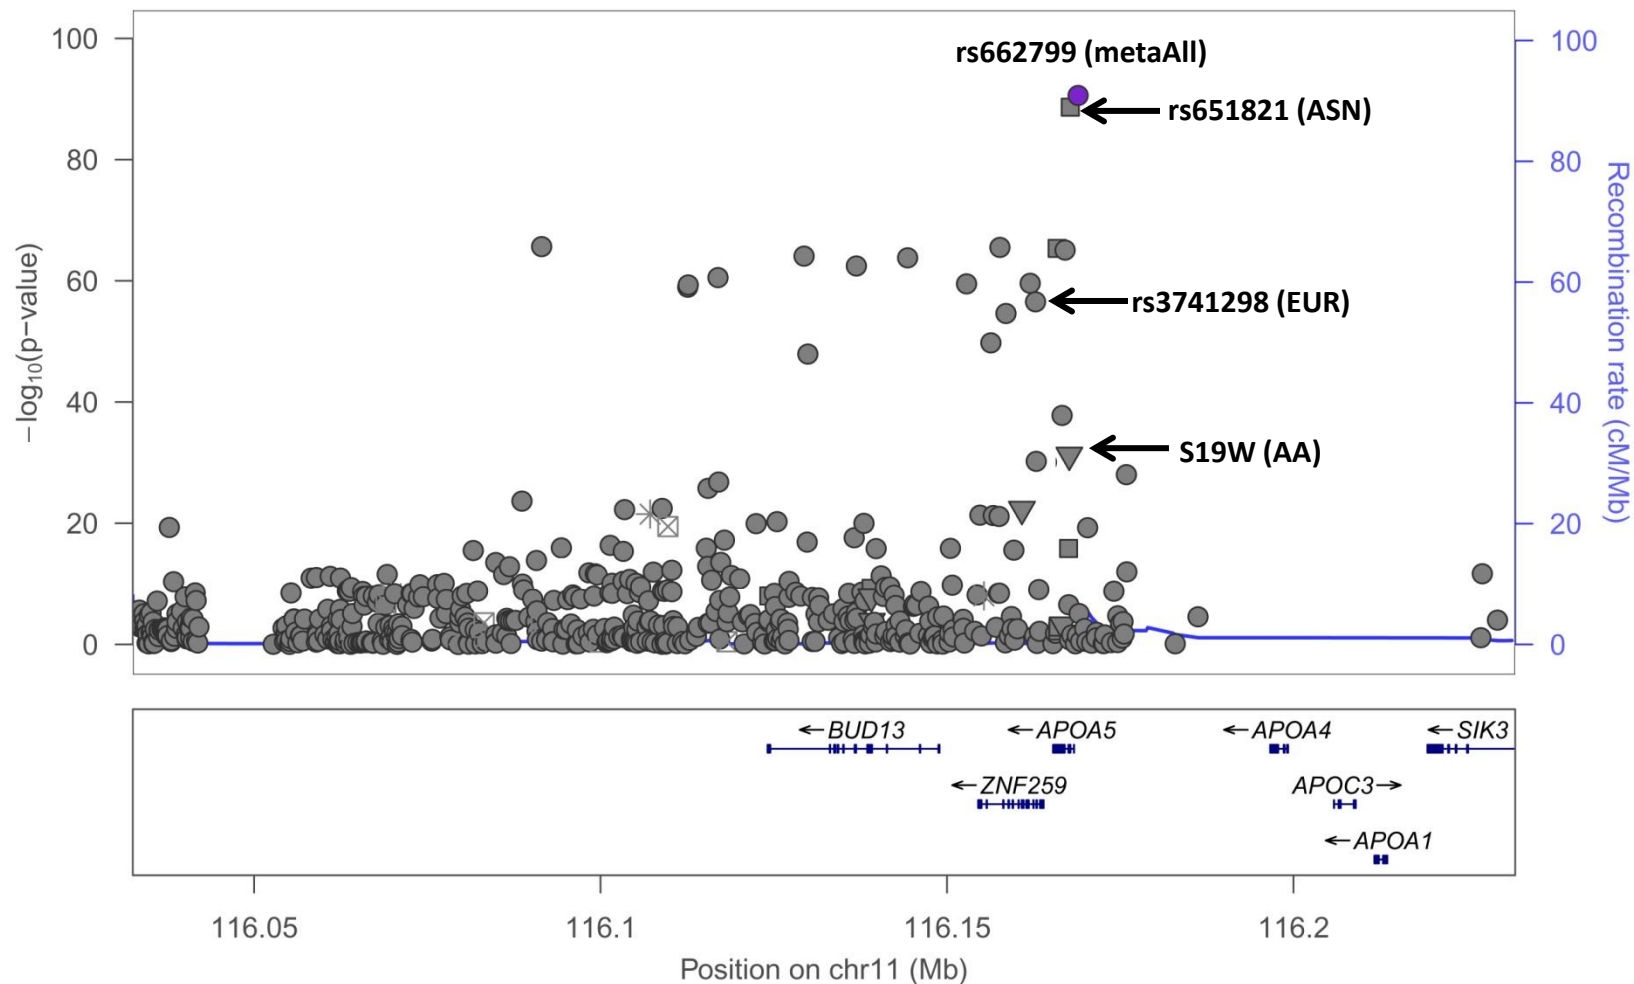

**FigureS6D.** Association at TG locus *APOA5* in the trans-ethnic meta-analysis. Index SNP rs662799 is the variant showing the strongest evidence of association in trans-ethnic meta-analysis. The SNPs with the smallest  $P$  values in Europeans (rs3741298), East Asians (-3A>G) and African Americans (S19W) are also indicated.
