# Supplementary material for: Trans-Ethnic Fine-Mapping of Lipid Loci Identifies Population-Specific Signals and Allelic Heterogeneity That Increases the Trait Variance Explained
Source: PubMed Central journal article supplement (PMC3605054; doi:10.1371/journal.pgen.1003379), 2013-03-21
Supplement: pgen.1003379.s007.pdf [file pgen.1003379.s007.pdf]

Table S1. Characteristics of the study samples

| A. Study Characteristics                      |                                                                                                                                                                                                 |                                                                                                                                                                                                 |                                                                                                                                                                                                 |                                                                                                                                                                                                 |                                                                                                             |                                                                                                                                                                                                                        |                                                              |                                                                                                                                                                                               |                                                                                                                                                                                               |                                                                                                                                                                                               |                                                                                                                                                                                               |
|-----------------------------------------------|-------------------------------------------------------------------------------------------------------------------------------------------------------------------------------------------------|-------------------------------------------------------------------------------------------------------------------------------------------------------------------------------------------------|-------------------------------------------------------------------------------------------------------------------------------------------------------------------------------------------------|-------------------------------------------------------------------------------------------------------------------------------------------------------------------------------------------------|-------------------------------------------------------------------------------------------------------------|------------------------------------------------------------------------------------------------------------------------------------------------------------------------------------------------------------------------|--------------------------------------------------------------|-----------------------------------------------------------------------------------------------------------------------------------------------------------------------------------------------|-----------------------------------------------------------------------------------------------------------------------------------------------------------------------------------------------|-----------------------------------------------------------------------------------------------------------------------------------------------------------------------------------------------|-----------------------------------------------------------------------------------------------------------------------------------------------------------------------------------------------|
| Study                                         | ARIC                                                                                                                                                                                            | MEC                                                                                                                                                                                             | WHI Batch1                                                                                                                                                                                      | WHI Batch2                                                                                                                                                                                      | HyperGEN                                                                                                    | CLHNS                                                                                                                                                                                                                  | TAICHI                                                       | Finnish T2D patients <sup>a</sup>                                                                                                                                                             | Finnish unaffected <sup>a</sup>                                                                                                                                                               | Norwegian T2D <sup>b</sup>                                                                                                                                                                    | Norwegian unaffected <sup>b</sup>                                                                                                                                                             |
| Study design                                  | population-based                                                                                                                                                                                | population-based                                                                                                                                                                                | population-based                                                                                                                                                                                | population-based                                                                                                                                                                                | family-based                                                                                                | population-based                                                                                                                                                                                                       | population-based                                             | Selected T2D cases from population-based studies                                                                                                                                              | Selected controls from population-based studies                                                                                                                                               | Selected T2D cases from population-based studies                                                                                                                                              | Selected controls from population-based studies                                                                                                                                               |
| Ethnicity of study participants               | African American                                                                                                                                                                                | African American                                                                                                                                                                                | African American                                                                                                                                                                                | African American                                                                                                                                                                                | African American                                                                                            | East Asian                                                                                                                                                                                                             | East Asian                                                   | European                                                                                                                                                                                      | European                                                                                                                                                                                      | European                                                                                                                                                                                      | European                                                                                                                                                                                      |
| B. Phenotypes                                 |                                                                                                                                                                                                 |                                                                                                                                                                                                 |                                                                                                                                                                                                 |                                                                                                                                                                                                 |                                                                                                             |                                                                                                                                                                                                                        |                                                              |                                                                                                                                                                                               |                                                                                                                                                                                               |                                                                                                                                                                                               |                                                                                                                                                                                               |
| Total sample size (% female)                  | 3,180 (62.4)                                                                                                                                                                                    | 380 (17.1)                                                                                                                                                                                      | 1,387 (100)                                                                                                                                                                                     | 646 (100)                                                                                                                                                                                       | 1,230 (66.9)                                                                                                | 1,716 (47.6)                                                                                                                                                                                                           | 7,733 (38.7)                                                 | 1,970 (30.7)                                                                                                                                                                                  | 6,066 (45.3)                                                                                                                                                                                  | 1,298 (50.0)                                                                                                                                                                                  | 1,495 (49.6)                                                                                                                                                                                  |
| Age (mean±SD, yrs)                            | 53.6±5.9                                                                                                                                                                                        | ---- <sup>c</sup>                                                                                                                                                                               | 61.7±7.2                                                                                                                                                                                        | 60.7±6.6                                                                                                                                                                                        | 47.0±12.6                                                                                                   | 21.5±0.3                                                                                                                                                                                                               | 65.46 ± 11.44                                                | 60.3 ± 8.1                                                                                                                                                                                    | 58.4 ± 8.4                                                                                                                                                                                    | 64.2 ± 12.8                                                                                                                                                                                   | 63.3 ± 13.9                                                                                                                                                                                   |
| Fasting status                                | ≥ 8 hours                                                                                                                                                                                       | ≥ 8 hours                                                                                                                                                                                       | ≥ 8 hours                                                                                                                                                                                       | ≥ 8 hours                                                                                                                                                                                       | ≥ 8 hours                                                                                                   | ≥ 8 hours                                                                                                                                                                                                              | various                                                      | overnight or >8 hours fast                                                                                                                                                                    | overnight or >8 hours fast                                                                                                                                                                    | non-fasting                                                                                                                                                                                   | non-fasting                                                                                                                                                                                   |
| Use of lipid-lowering medication & exclusion  | NO exclusion <sup>d</sup>                                                                                                                                                                       | NO exclusion <sup>d</sup>                                                                                                                                                                       | NO exclusion <sup>d</sup>                                                                                                                                                                       | NO exclusion <sup>d</sup>                                                                                                                                                                       | NO exclusion <sup>d</sup>                                                                                   | NO exclusion <sup>d</sup>                                                                                                                                                                                              | NO exclusion <sup>d</sup>                                    | Exclude when known to be on lipid-lowering medication                                                                                                                                         | Exclude when known to be on lipid-lowering medication                                                                                                                                         | NO relevant information available                                                                                                                                                             | NO relevant information available                                                                                                                                                             |
| Methods/reagents of triglycerides measurement | Standard enzymatic methods                                                                                                                                                                      | Standard enzymatic methods                                                                                                                                                                      | Standard enzymatic methods                                                                                                                                                                      | Standard enzymatic methods                                                                                                                                                                      | Standard enzymatic methods                                                                                  | Standard enzymatic methods                                                                                                                                                                                             | varied across study sites                                    | Standard enzymatic methods                                                                                                                                                                    | Standard enzymatic methods                                                                                                                                                                    | Standard enzymatic methods                                                                                                                                                                    | Standard enzymatic methods                                                                                                                                                                    |
| Methods/reagents of HDL-C measurement         | Standard enzymatic methods                                                                                                                                                                      | Standard enzymatic methods                                                                                                                                                                      | Standard enzymatic methods                                                                                                                                                                      | Standard enzymatic methods                                                                                                                                                                      | Standard enzymatic methods                                                                                  | Standard enzymatic methods                                                                                                                                                                                             | Homogenous assay direct HDL-C (Equal Diagnostics, Exton, PA) | Standard enzymatic methods                                                                                                                                                                    | Standard enzymatic methods                                                                                                                                                                    | Standard enzymatic methods                                                                                                                                                                    | Standard enzymatic methods                                                                                                                                                                    |
| Methods/reagents of LDL-C measurement         | Calculated using Friedewald equation                                                                                                                                                            | Calculated using Friedewald equation                                                                                                                                                            | Calculated using Friedewald equation                                                                                                                                                            | Calculated using Friedewald equation                                                                                                                                                            | Calculated using Friedewald equation                                                                        | Calculated using Friedewald equation                                                                                                                                                                                   | Homogenous assay direct LDL-C (Equal Diagnostics, Exton, PA) | Calculated using Friedewald equation                                                                                                                                                          | Calculated using Friedewald equation                                                                                                                                                          | Calculated using Friedewald equation                                                                                                                                                          | Calculated using Friedewald equation                                                                                                                                                          |
| Triglycerides (median [interquartile])        | 1.10 (0.81-1.51)                                                                                                                                                                                | 1.30 (0.82-1.53)                                                                                                                                                                                | 1.35 (0.93-1.59)                                                                                                                                                                                | 1.08 (0.81-1.46)                                                                                                                                                                                | 1.04 (0.75-1.50)                                                                                            | 1.04 (0.75-1.50)                                                                                                                                                                                                       | 1.19 (0.74-1.41)                                             | 1.33 (0.94 - 1.95)                                                                                                                                                                            | 1.83 (1.14-2.17)                                                                                                                                                                              | 2.60 (1.53-3.19)                                                                                                                                                                              | 1.87 (1.13-2.34)                                                                                                                                                                              |
| HDL-C (mean±SD, mmol/L)                       | 1.42 ± 0.45                                                                                                                                                                                     | 1.37 ± 0.38                                                                                                                                                                                     | 1.51 ± 0.39                                                                                                                                                                                     | 1.47 ± 0.38                                                                                                                                                                                     | 1.38 ± 0.41                                                                                                 | 1.38 ± 0.41                                                                                                                                                                                                            | 1.09 ± 0.29                                                  | 1.21 ± 0.36                                                                                                                                                                                   | 1.33 ± 0.39                                                                                                                                                                                   | 1.26 ± 0.39                                                                                                                                                                                   | 1.42 ± 0.41                                                                                                                                                                                   |
| LDL-C (mean±SD, mmol/L)                       | 3.57 ± 1.12                                                                                                                                                                                     | 3.20 ± 1.13                                                                                                                                                                                     | 3.40 ± 0.99                                                                                                                                                                                     | 3.69 ± 1.02                                                                                                                                                                                     | 3.08 ± 0.97                                                                                                 | 3.08 ± 0.97                                                                                                                                                                                                            | 2.44 ± 0.75                                                  | 2.93 ± 0.91                                                                                                                                                                                   | 3.32 ± 0.94                                                                                                                                                                                   | 4.16 ± 1.11                                                                                                                                                                                   | 4.27 ± 1.14                                                                                                                                                                                   |
| C. Genotyping                                 |                                                                                                                                                                                                 |                                                                                                                                                                                                 |                                                                                                                                                                                                 |                                                                                                                                                                                                 |                                                                                                             |                                                                                                                                                                                                                        |                                                              |                                                                                                                                                                                               |                                                                                                                                                                                               |                                                                                                                                                                                               |                                                                                                                                                                                               |
| Metabochip genotype calling                   | GenCall                                                                                                                                                                                         | GenCall                                                                                                                                                                                         | GenCall                                                                                                                                                                                         | GenCall                                                                                                                                                                                         | BeadStudio                                                                                                  | BeadStudio                                                                                                                                                                                                             | BeadStudio                                                   | GenomeStudio                                                                                                                                                                                  | GenomeStudio                                                                                                                                                                                  | GenomeStudio                                                                                                                                                                                  | GenomeStudio                                                                                                                                                                                  |
| HWE P value threshold                         | > 1E-06                                                                                                                                                                                         | > 1E-06                                                                                                                                                                                         | > 1E-06                                                                                                                                                                                         | > 1E-06                                                                                                                                                                                         | > 1E-06                                                                                                     | > 1E-06                                                                                                                                                                                                                | > 0.001                                                      | n.a.                                                                                                                                                                                          | n.a.                                                                                                                                                                                          | n.a.                                                                                                                                                                                          | n.a.                                                                                                                                                                                          |
| SNP call rate                                 | 95%                                                                                                                                                                                             | 95%                                                                                                                                                                                             | 95%                                                                                                                                                                                             | 95%                                                                                                                                                                                             | 95%                                                                                                         | 97%                                                                                                                                                                                                                    | 95%                                                          | 95%                                                                                                                                                                                           | 95%                                                                                                                                                                                           | 95%                                                                                                                                                                                           | 95%                                                                                                                                                                                           |
| SNP MAF threshold                             | n.a.                                                                                                                                                                                            | n.a.                                                                                                                                                                                            | n.a.                                                                                                                                                                                            | n.a.                                                                                                                                                                                            | n.a.                                                                                                        | n.a.                                                                                                                                                                                                                   | n.a.                                                         | n.a.                                                                                                                                                                                          | n.a.                                                                                                                                                                                          | n.a.                                                                                                                                                                                          | n.a.                                                                                                                                                                                          |
| Other SNP QC                                  | Mendelian errors in YRI > 1 (out of 30 trios); Discordant calls on YRI > 3 (out of 90 samples); Discordant calls from GenoSNP > 3.3%; PAGE consensus vs HapMap database > 3 (out of 90 samples) | Mendelian errors in YRI > 1 (out of 30 trios); Discordant calls on YRI > 3 (out of 90 samples); Discordant calls from GenoSNP > 3.3%; PAGE consensus vs HapMap database > 3 (out of 90 samples) | Mendelian errors in YRI > 1 (out of 30 trios); Discordant calls on YRI > 3 (out of 90 samples); Discordant calls from GenoSNP > 3.3%; PAGE consensus vs HapMap database > 3 (out of 90 samples) | Mendelian errors in YRI > 1 (out of 30 trios); Discordant calls on YRI > 3 (out of 90 samples); Discordant calls from GenoSNP > 3.3%; PAGE consensus vs HapMap database > 3 (out of 90 samples) | GenTrain score <0.7; Cluster Separation Score < 0.45 (both GenTrain and CSS were selected at 5% percentile) | poor genotyping cluster; MI errors in ≥ 3 samples; SNPs with ≥ 3 discrepancies with known HapMap genotypes among 14 CEU samples; SNPs with primers that do not map > 97% to genome or map to multiple places in genome | replication errors (1 or more)                               | Cluster Separation score less than 0.2 or which had more than 1 replicate error as defined with the HapMap control samples. Additional hand editing was done for X, Y and Mitochondrial loci. | Cluster Separation score less than 0.2 or which had more than 1 replicate error as defined with the HapMap control samples. Additional hand editing was done for X, Y and Mitochondrial loci. | Cluster Separation score less than 0.2 or which had more than 1 replicate error as defined with the HapMap control samples. Additional hand editing was done for X, Y and Mitochondrial loci. | Cluster Separation score less than 0.2 or which had more than 1 replicate error as defined with the HapMap control samples. Additional hand editing was done for X, Y and Mitochondrial loci. |
| Sample success rate                           | ≥98.98%                                                                                                                                                                                         | ≥97.74%                                                                                                                                                                                         | ≥97.70%                                                                                                                                                                                         | ≥97.70%                                                                                                                                                                                         | ≥98.5%                                                                                                      | ≥ 98.6%                                                                                                                                                                                                                | ≥ 98.49%                                                     | ≥ 98.15%                                                                                                                                                                                      | ≥ 98.15%                                                                                                                                                                                      | ≥ 98.15%                                                                                                                                                                                      | ≥ 98.15%                                                                                                                                                                                      |
| Concordance rate for duplicate pairs          | 99.51%                                                                                                                                                                                          | 99.99%                                                                                                                                                                                          | 99.99%                                                                                                                                                                                          | 99.99%                                                                                                                                                                                          | 99.98%                                                                                                      | 99.99%                                                                                                                                                                                                                 | ----                                                         | Across all our Metabochip samples, 99.9978% reproducibility among 163 blind duplicate pairs; 99.52% concordance with HapMap genotypes (326 HapMap controls)                                   | Across all our Metabochip samples, 99.9978% reproducibility among 163 blind duplicate pairs; 99.52% concordance with HapMap genotypes (326 HapMap controls)                                   | Across all our Metabochip samples, 99.9978% reproducibility among 163 blind duplicate pairs; 99.52% concordance with HapMap genotypes (326 HapMap controls)                                   | Across all our Metabochip samples, 99.9978% reproducibility among 163 blind duplicate pairs; 99.52% concordance with HapMap genotypes (326 HapMap controls)                                   |
| D. Statistical analysis                       |                                                                                                                                                                                                 |                                                                                                                                                                                                 |                                                                                                                                                                                                 |                                                                                                                                                                                                 |                                                                                                             |                                                                                                                                                                                                                        |                                                              |                                                                                                                                                                                               |                                                                                                                                                                                               |                                                                                                                                                                                               |                                                                                                                                                                                               |
| Software for association analyses             | PLINK                                                                                                                                                                                           | PLINK                                                                                                                                                                                           | PLINK                                                                                                                                                                                           | PLINK                                                                                                                                                                                           | GWAF                                                                                                        | PLINK                                                                                                                                                                                                                  | PLINK                                                        | EMMAX                                                                                                                                                                                         | EMMAX                                                                                                                                                                                         | EMMAX                                                                                                                                                                                         | EMMAX                                                                                                                                                                                         |
| Statistical model                             | multiple linear                                                                                                                                                                                 | multiple linear                                                                                                                                                                                 | multiple linear                                                                                                                                                                                 | multiple linear                                                                                                                                                                                 | linear mixed effect                                                                                         | multiple linear                                                                                                                                                                                                        | multiple linear                                              | mixed model                                                                                                                                                                                   | mixed model                                                                                                                                                                                   | mixed model                                                                                                                                                                                   | mixed model                                                                                                                                                                                   |
| Covariates used                               | age, sex, PC1-10                                                                                                                                                                                | age, sex, PC1-10                                                                                                                                                                                | age, PC1-10                                                                                                                                                                                     | age, PC1-10                                                                                                                                                                                     | age, sex, PC1-10                                                                                            | age, sex, household assets, household income, PC1                                                                                                                                                                      | age, sex, PC1-PC5, study cohort                              | sex, age, age <sup>2</sup> , study                                                                                                                                                            | sex, age, age <sup>2</sup> , study                                                                                                                                                            | sex, age, age <sup>2</sup> , study                                                                                                                                                            | sex, age, age <sup>2</sup> , study                                                                                                                                                            |

<sup>a</sup> Finnish T2D patients and unaffected individuals were from the Finland-United States Investigation of NIDDM Genetics (FUSION), Dehko 2D 2007 (D2D2007), Diabetes Prevention Study (DPS), Dose-Responses to Exercise Training (DR's EXTRA), and Metabolic Syndrome in Men (METSIM)

<sup>b</sup> Norwegian T2D patients and unaffected individuals were from the cohorts of Nord-Trøndelag Health Study (HUNT 2) and the Tromsø Study (TROMSO)

<sup>c</sup> The mean and SD were not provided for MEC because the ages of MEC subjects were provided as a categorical value with seven 5-year age groups due to confidentiality

<sup>d</sup> Sensitivity analyses that excluded individuals on lipid lowering medication did not appreciably alter the association results
