# Supplementary material for: Trans-Ethnic Fine-Mapping of Lipid Loci Identifies Population-Specific Signals and Allelic Heterogeneity That Increases the Trait Variance Explained
Source: PubMed Central journal article supplement (PMC3605054; doi:10.1371/journal.pgen.1003379), 2013-03-21
Supplement: pgen.1003379.s008.pdf [file pgen.1003379.s008.pdf]

**Table S2. Number of SNPs at each locus for analysis in each of the three ancestry groups**

| Locus          | Chr | Pos_start | Pos_end   | Length (kb) | Trait | African American | East Asian   | European     |
|----------------|-----|-----------|-----------|-------------|-------|------------------|--------------|--------------|
| <i>ANGPTL3</i> | 1   | 62605319  | 63131404  | 526.1       | TG    | 825              | 480          | 474          |
| <i>APOB</i>    | 2   | 20968276  | 21115932  | 147.7       | TG    | 485              | 249          | 271          |
| <i>GCKR</i>    | 2   | 27240303  | 28524485  | 1284.2      | TG    | 2220             | 1060         | 1300         |
| <i>KLHL8</i>   | 4   | 88199054  | 88388945  | 189.9       | TG    | 415              | 248          | 286          |
| <i>MAP3K1</i>  | 5   | 55876150  | 55917936  | 41.8        | TG    | 116              | 80           | 80           |
| <i>TYW1B</i>   | 7   | 71646192  | 71931044  | 284.9       | TG    | 279              | 109          | 118          |
| <i>MLXIPL</i>  | 7   | 72339015  | 72771177  | 432.2       | TG    | 585              | 266          | 325          |
| <i>PINX1</i>   | 8   | 10619933  | 10769460  | 149.5       | TG    | 529              | 393          | 386          |
| <i>NAT2</i>    | 8   | 18278054  | 18335870  | 57.8        | TG    | 294              | 195          | 212          |
| <i>LPL</i>     | 8   | 19772866  | 20011766  | 238.9       | TG    | 1067             | 633          | 662          |
| <i>TRIB1</i>   | 8   | 126533689 | 126579084 | 45.4        | TG    | 191              | 116          | 126          |
| <i>APOA5</i>   | 11  | 116032491 | 116232000 | 199.5       | TG    | 543              | 370          | 398          |
| <i>LRP1</i>    | 12  | 55910892  | 56137449  | 226.6       | TG    | 103              | 50           | 54           |
| <i>KLF12</i>   | 13  | 73456517  | 73492535  | 36.0        | TG    | 99               | 68           | 72           |
| <i>CAPN3</i>   | 15  | 40402264  | 40539209  | 136.9       | TG    | 213              | 155          | 173          |
| <i>LIPC</i>    | 15  | 56450000  | 56550000  | 100.0       | TG    | 178              | 126          | 133          |
| <i>CETP</i>    | 16  | 55540320  | 55565013  | 24.7        | TG    | 100              | 65           | 72           |
| <i>APOC1</i>   | 19  | 50059760  | 50164446  | 104.7       | TG    | 109              | 69           | 79           |
| <i>GALNT2</i>  | 1   | 228268651 | 228485397 | 216.7       | HDL-C | 694              | 502          | 536          |
| <i>APOB</i>    | 2   | 20968276  | 21115932  | 147.7       | HDL-C | 485              | 249          | 271          |
| <i>COBLL1</i>  | 2   | 165207794 | 165440664 | 232.9       | HDL-C | 456              | 297          | 314          |
| <i>PPP1R3B</i> | 8   | 9205275   | 9422842   | 217.6       | HDL-C | 888              | 630          | 666          |
| <i>LPL</i>     | 8   | 19772866  | 20011766  | 238.9       | HDL-C | 1067             | 633          | 662          |
| <i>TTC39B</i>  | 9   | 15272851  | 15326653  | 53.8        | HDL-C | 172              | 131          | 137          |
| <i>ABCA1</i>   | 9   | 106677603 | 106711480 | 33.9        | HDL-C | 149              | 75           | 100          |
| <i>ARFGAP2</i> | 11  | 46654261  | 47310074  | 655.8       | HDL-C | 894              | 497          | 554          |
| <i>FADS3</i>   | 11  | 61276118  | 61489925  | 213.8       | HDL-C | 551              | 339          | 336          |
| <i>APOA5</i>   | 11  | 116032491 | 116175948 | 143.5       | HDL-C | 543              | 370          | 390          |
| <i>MMAB</i>    | 12  | 108256738 | 108565110 | 308.4       | HDL-C | 788              | 600          | 621          |
| <i>SCARB1</i>  | 12  | 123820589 | 123834385 | 13.8        | HDL-C | 43               | 30           | 32           |
| <i>LIPC</i>    | 15  | 56450000  | 56550000  | 100.0       | HDL-C | 178              | 126          | 133          |
| <i>LACTB</i>   | 15  | 61106592  | 61346662  | 240.1       | HDL-C | 454              | 296          | 319          |
| <i>CETP</i>    | 16  | 55540320  | 55565013  | 24.7        | HDL-C | 100              | 65           | 72           |
| <i>LCAT</i>    | 16  | 66109606  | 66883748  | 774.1       | HDL-C | 814              | 452          | 514          |
| <i>STARD3</i>  | 17  | 34640966  | 35328044  | 687.1       | HDL-C | 842              | 473          | 500          |
| <i>ABCA8</i>   | 17  | 64325421  | 64414888  | 89.5        | HDL-C | 181              | 138          | 132          |
| <i>LIPG</i>    | 18  | 45378906  | 45436862  | 58.0        | HDL-C | 303              | 236          | 226          |
| <i>LILRA3</i>  | 19  | 59464550  | 59502182  | 37.6        | HDL-C | 142              | 92           | 94           |
| <i>HNF4A</i>   | 20  | 42472196  | 42491494  | 19.3        | HDL-C | 49               | 35           | 38           |
| <i>PLTP</i>    | 20  | 43965592  | 44095820  | 130.2       | HDL-C | 310              | 176          | 197          |
| <i>LDLRAP1</i> | 1   | 25398494  | 25780828  | 382.3       | LDL-C | 535              | 178          | 255          |
| <i>PCSK9</i>   | 1   | 55271537  | 55310000  | 38.5        | LDL-C | 96               | 57           | 59           |
| <i>SORT1</i>   | 1   | 109457160 | 109845216 | 388.1       | LDL-C | 760              | 453          | 448          |
| <i>APOB</i>    | 2   | 21080065  | 21305332  | 225.3       | LDL-C | 858              | 503          | 527          |
| <i>ABCG8</i>   | 2   | 43910534  | 43954353  | 43.8        | LDL-C | 172              | 72           | 106          |
| <i>HMGCR</i>   | 5   | 74603868  | 74991808  | 387.9       | LDL-C | 598              | 383          | 405          |
| <i>TIMD4</i>   | 5   | 156263672 | 156437811 | 174.1       | LDL-C | 474              | 247          | 265          |
| <i>MYLIP</i>   | 6   | 16212233  | 16242816  | 30.6        | LDL-C | 68               | 50           | 52           |
| <i>SLC22A1</i> | 6   | 160388268 | 160499517 | 111.2       | LDL-C | 284              | 186          | 189          |
| <i>TRIB1</i>   | 8   | 126510832 | 126613110 | 102.3       | LDL-C | 368              | 213          | 238          |
| <i>ABO</i>     | 9   | 135032145 | 135472297 | 440.2       | LDL-C | 1181             | 931          | 823          |
| <i>ST3GAL4</i> | 11  | 125724639 | 125784557 | 59.9        | LDL-C | 167              | 107          | 92           |
| <i>DHODH</i>   | 16  | 70553792  | 70705184  | 151.4       | LDL-C | 402              | 277          | 282          |
| <i>LDLR</i>    | 19  | 11044837  | 11072208  | 27.4        | LDL-C | 60               | 35           | 32           |
| <i>CILP2</i>   | 19  | 19162232  | 19653250  | 491.0       | LDL-C | 946              | 591          | 606          |
| <i>APOE</i>    | 19  | 50088739  | 50136106  | 47.4        | LDL-C | 72               | 41           | 47           |
| <i>MAFB</i>    | 20  | 38516556  | 38561992  | 45.4        | LDL-C | 92               | 49           | 56           |
| <i>TOP1</i>    | 20  | 39047398  | 39443459  | 396.1       | LDL-C | 556              | 311          | 346          |
| <b>Total:</b>  |     |           |           |             |       | <b>26143</b>     | <b>15858</b> | <b>16883</b> |
| <b>Mean:</b>   |     |           |           |             |       | <b>451</b>       | <b>273</b>   | <b>291</b>   |
