# Supplementary material for: Trans-Ethnic Fine-Mapping of Lipid Loci Identifies Population-Specific Signals and Allelic Heterogeneity That Increases the Trait Variance Explained
Source: PubMed Central journal article supplement (PMC3605054; doi:10.1371/journal.pgen.1003379), 2013-03-21
Supplement: pgen.1003379.s009.pdf [file pgen.1003379.s009.pdf]

**Table S3A. Lead SNP at TG loci within each ancestry group and their relative significance compared to reported GWAS index SNPs**

| <i>TG</i><br><i>Locus</i> | <b>African American</b> |                    |            |          |                                             | <b>East Asian</b> |            |          |                                             | <b>European</b>   |            |          |                                             |
|---------------------------|-------------------------|--------------------|------------|----------|---------------------------------------------|-------------------|------------|----------|---------------------------------------------|-------------------|------------|----------|---------------------------------------------|
|                           |                         | <b>Index SNP</b>   | <b>MAF</b> | <b>P</b> | <b>LD (<math>r^2/D'</math>)<sup>a</sup></b> | <b>Index SNP</b>  | <b>MAF</b> | <b>P</b> | <b>LD (<math>r^2/D'</math>)<sup>b</sup></b> | <b>Index SNP</b>  | <b>MAF</b> | <b>P</b> | <b>LD (<math>r^2/D'</math>)<sup>c</sup></b> |
| <i>APOA5</i>              | GWAS <sup>d</sup>       | rs12286037         | 0.191      | 4.00E-01 | 0.04/0.36                                   | rs12286037        | 0.008      | 6.60E-01 | n.a.                                        | rs12286037        | 0.058      | 4.55E-18 | 0.23/1.00                                   |
|                           | MetaboChip              | rs3135506 (S19W)   | 0.058      | 8.36E-15 |                                             | rs651821 (-3A>G)  | 0.275      | 7.21E-68 |                                             | rs3741298         | 0.222      | 9.68E-44 |                                             |
| <i>GCKR</i>               | GWAS                    | rs1260326          | 0.149      | 2.20E-08 | same                                        | rs1260326         | 0.484      | 1.54E-13 | 0.42/0.93                                   | rs1260326         | 0.350      | 6.04E-24 | same                                        |
|                           | MetaboChip              | rs1260326 (L446P)  | 0.149      | 2.20E-08 |                                             | rs814295          | 0.350      | 1.52E-13 |                                             | rs1260326 (L446P) | 0.350      | 4.40E-24 |                                             |
| <i>LPL</i>                | GWAS                    | rs12678919         | 0.112      | 1.94E-03 | 0.29/0.60                                   | rs12678919        | 0.094      | 1.25E-10 | 0.86/1.00                                   | rs12678919        | 0.088      | 2.63E-11 | 0.31/1.00                                   |
|                           | MetaboChip              | rs75551077         | 0.135      | 1.31E-09 |                                             | rs1803924         | 0.095      | 1.11E-11 |                                             | rs15285 (3'UTR)   | 0.258      | 1.08E-16 |                                             |
| <i>TRIB1</i>              | GWAS                    | rs2954029          | 0.350      | 7.52E-01 | 0.05/0.94                                   | rs2954029         | 0.452      | 1.74E-03 | 0.56/1.00                                   | rs2954029         | 0.465      | 1.54E-16 | same                                        |
|                           | MetaboChip              | rs2980858          | 0.094      | 3.12E-06 |                                             | rs2954018         | 0.290      | 1.70E-05 |                                             | rs2954029         | 0.465      | 1.54E-16 |                                             |
| <i>APOC1</i>              | GWAS                    | rs439401           | 0.155      | 2.06E-01 | 0.03/0.99                                   | rs439401          | 0.430      | 4.02E-04 | 0.06/0.46                                   | rs439401          | 0.301      | 1.82E-04 | 0.02/0.51                                   |
|                           | MetaboChip              | rs12721054 (3'UTR) | 0.119      | 3.57E-19 |                                             | rs7259004         | 0.244      | 4.11E-05 |                                             | rs445925          | 0.084      | 1.38E-04 |                                             |
| <i>MLXIPL</i>             | GWAS                    | rs17145738         | 0.091      | 8.29E-04 | 0.99/1.00                                   | rs17145738        | 0.099      | 1.85E-08 | 0.68/0.92                                   | rs17145738        | 0.127      | 3.17E-05 | 0.32/0.94                                   |
|                           | MetaboChip              | rs13246490         | 0.091      | 6.77E-04 |                                             | rs67566641        | 0.088      | 7.75E-11 |                                             | rs7808877         | 0.245      | 2.55E-08 |                                             |
| <i>ANGPTL3</i>            | GWAS                    | rs2131925          | 0.348      | 1.00E-01 | 0.06/0.94                                   | rs2131925         | 0.259      | 8.06E-04 | 0.89/1.00                                   | rs2131925         | 0.281      | 1.41E-11 | 0.98/0.99                                   |
|                           | MetaboChip              | rs7523145          | 0.121      | 7.19E-05 |                                             | rs1748199         | 0.223      | 2.86E-05 |                                             | rs1748199         | 0.281      | 9.87E-12 |                                             |
| <i>APOB</i>               | GWAS                    | rs1042034          | 0.157      | 4.81E-06 | 1.00/1.00                                   | rs1042034         | 0.276      | 7.48E-01 | 0.27/1.00                                   | rs1042034         | 0.260      | 1.64E-10 | 0.99/0.99                                   |
|                           | MetaboChip              | rs676210 (P2739L)  | 0.157      | 3.97E-06 |                                             | rs13306194        | 0.149      | 9.87E-05 |                                             | rs2678379         | 0.260      | 1.50E-10 |                                             |
| <i>LIPC</i>               | GWAS                    | rs1532085          | 0.481      | 3.07E-02 | 0.01/0.84                                   | rs1532085         | 0.465      | 1.69E-01 | 0.44/1.00                                   | rs1532085         | 0.423      | 5.18E-05 | 0.64/0.98                                   |
|                           | MetaboChip              | rs115573508        | 0.012      | 1.37E-03 |                                             | rs7164909         | 0.348      | 9.87E-03 |                                             | rs10468017        | 0.328      | 2.99E-06 |                                             |
| <i>CETP</i>               | GWAS                    | rs3764261          | 0.319      | 5.26E-01 | 0.00/0.11                                   | rs3764261         | 0.166      | 1.53E-01 | 0.00/0.25                                   | rs3764261         | 0.282      | 3.66E-02 | 0.10/0.96                                   |
|                           | MetaboChip              | rs186526203        | 0.144      | 3.90E-03 |                                             | rs79374262        | 0.016      | 1.46E-02 |                                             | rs11076175        | 0.175      | 1.01E-04 |                                             |
| <i>NAT2</i>               | GWAS                    | rs1495741          | n.a.       | n.a.     | n.a.                                        | rs1495741         | n.a.       | n.a.     | 0.71/0.96                                   | rs1495741         | n.a.       | n.a.     | 0.13/0.96                                   |
|                           | MetaboChip              | rs78728596         | 0.145      | 1.24E-03 |                                             | rs4921911         | 0.424      | 7.36E-04 |                                             | rs1041983 (Y94Y)  | 0.282      | 2.39E-03 |                                             |
| <i>KLHL8</i>              | GWAS                    | rs442177           | 0.499      | 6.31E-01 | 0.00/0.63                                   | rs442177          | 0.421      | 4.58E-02 | 0.22/0.69                                   | rs442177          | 0.261      | 6.09E-02 | 0.09/0.48                                   |
|                           | MetaboChip              | rs113071385        | 0.009      | 5.00E-04 |                                             | rs2061498         | 0.345      | 7.55E-04 |                                             | rs4134363         | 0.221      | 6.26E-04 |                                             |
| <i>PINX1</i>              | GWAS                    | rs11776767         | 0.351      | 2.87E-01 | 0.03/0.42                                   | rs11776767        | 0.224      | 6.50E-01 | 0.01/0.97                                   | rs11776767        | 0.313      | 1.27E-01 | 0.47/0.89                                   |
|                           | MetaboChip              | rs17152623         | 0.253      | 5.56E-04 |                                             | rs118016348       | 0.009      | 1.60E-02 |                                             | rs7014285         | 0.199      | 1.06E-02 |                                             |
| <i>TYWIB</i>              | GWAS                    | rs13238203         | 0.007      | 6.27E-01 | 0.00/1.00                                   | rs13238203        | n.a.       | n.a.     | n.a.                                        | rs13238203        | n.a.       | n.a.     | 1.00/0.00                                   |
|                           | MetaboChip              | rs114204448        | 0.020      | 8.95E-04 |                                             | rs1892751         | 0.357      | 5.60E-02 |                                             | rs71553242        | 0.025      | 1.64E-02 |                                             |
| <i>LRP1</i>               | GWAS                    | rs11613352         | 0.095      | 3.00E-01 | 0.01/1.00                                   | rs11613352        | 0.091      | 8.91E-01 | 0.00/1.00                                   | rs11613352        | 0.247      | 5.87E-01 | 0.02/1.00                                   |
|                           | MetaboChip              | rs10735872         | 0.087      | 1.83E-03 |                                             | rs117312963       | 0.001      | 1.32E-01 |                                             | rs11172224        | 0.008      | 3.61E-02 |                                             |
| <i>MAP3K1</i>             | GWAS                    | rs9686661          | 0.239      | 3.40E-01 | 0.07/1.00                                   | rs9686661         | 0.114      | 2.66E-01 | 0.06/1.00                                   | rs9686661         | 0.137      | 4.11E-03 | 0.93/0.97                                   |
|                           | MetaboChip              | rs74762860         | 0.184      | 6.32E-02 |                                             | rs6450394         | 0.336      | 4.68E-03 |                                             | rs3936510         | 0.143      | 1.40E-03 |                                             |
| <i>CAPN3</i>              | GWAS                    | rs2412710          | 0.074      | 8.74E-01 | 0.00/0.18                                   | rs2412710         | n.a.       | 9.38E-01 | 0.00/0.15                                   | rs2412710         | 0.013      | 8.00E-02 | 0.00/1.00                                   |
|                           | MetaboChip              | rs1801449 (A149S)  | 0.374      | 2.75E-03 |                                             | rs3742996         | 0.128      | 1.22E-02 |                                             | rs118166665       | 0.010      | 4.44E-02 |                                             |
| <i>KLF12</i>              | GWAS                    | rs9592961          | 0.018      | 4.29E-01 | 0.00/1.00                                   | rs9592961         | 0.061      | 7.85E-01 | 0.00/0.40                                   | rs9592961         | 0.006      | 9.66E-01 | 0.00/1.00                                   |
|                           | MetaboChip              | rs9543507          | 0.113      | 2.06E-02 |                                             | rs7328112         | 0.104      | 5.40E-02 |                                             | rs114713792       | 0.007      | 1.52E-01 |                                             |

<sup>a</sup> LD ( $r^2/D'$ ) estimates were calculated from the genotype data of the PAGE African American samples, whose LD patterns may vary from any LD sources in 1000 Genomes Project

<sup>b</sup> LD ( $r^2/D'$ ) estimates were from the 1000 Genomes Project ASN samples

<sup>c</sup> LD ( $r^2/D'$ ) estimates were from the 1000 Genomes Project EUR samples

<sup>d</sup> Results of association with reported GWAS index SNPs were based on current study samples

n.a. the GWAS index SNP was not genotyped by MetaboChip or was excluded in quality control, or the pairwise LD estimates are not applicable

**Table S3B. Lead SNP at HDL-C loci within each ancestry group and their relative significance compared to reported GWAS index SNPs**

| <i>HDL-C</i>   | African American  |             |       |          |                              | East Asian         |       |          |                              | European          |       |          |                              |
|----------------|-------------------|-------------|-------|----------|------------------------------|--------------------|-------|----------|------------------------------|-------------------|-------|----------|------------------------------|
|                | <i>Locus</i>      | Index SNP   | MAF   | <i>P</i> | LD ( $r^2/D'$ ) <sup>a</sup> | Index SNP          | MAF   | <i>P</i> | LD ( $r^2/D'$ ) <sup>b</sup> | Index SNP         | MAF   | <i>P</i> | LD ( $r^2/D'$ ) <sup>c</sup> |
| <i>CETP</i>    | GWAS <sup>d</sup> | rs3764261   | 0.319 | 8.78E-27 | 0.74/0.99                    | rs3764261          | 0.168 | 1.24E-27 | 1.00/1.00                    | rs3764261         | 0.285 | 2.21E-58 | 0.99/0.99                    |
|                | Metabochip        | rs247617    | 0.259 | 1.09E-42 |                              | rs17231506 (5'UTR) | 0.168 | 3.63E-28 |                              | rs56156922        | 0.284 | 4.68E-59 |                              |
| <i>LIPC</i>    | GWAS              | rs1532085   | 0.481 | 1.27E-01 | 0.00/0.02                    | rs1532085          | 0.474 | 2.87E-10 | 0.04/0.21                    | rs1532085         | 0.422 | 6.30E-19 | 0.59/1.00                    |
|                | Metabochip        | rs1077834   | 0.481 | 2.22E-06 |                              | rs588136           | 0.371 | 3.67E-14 |                              | rs10468017        | 0.327 | 2.53E-21 |                              |
| <i>LPL</i>     | GWAS              | rs12678919  | 0.113 | 4.13E-03 | 0.10/0.74                    | rs12678919         | 0.091 | 6.51E-06 | 1.00/1.00                    | rs12678919        | 0.088 | 5.33E-06 | 0.39/1.00                    |
|                | Metabochip        | rs10096633  | 0.421 | 1.01E-12 |                              | rs79236614         | 0.091 | 2.18E-06 |                              | rs15285 (3'UTR)   | 0.259 | 1.44E-09 |                              |
| <i>ABCA1</i>   | GWAS              | rs1883025   | 0.336 | 1.77E-02 | same                         | rs1883025          | 0.271 | 3.74E-11 | same                         | rs1883025         | 0.209 | 4.53E-07 | same                         |
|                | Metabochip        | rs1883025   | 0.336 | 1.77E-02 |                              | rs1883025          | 0.271 | 3.74E-11 |                              | rs1883025         | 0.209 | 4.53E-07 |                              |
| <i>APOA5</i>   | GWAS              | rs12286037  | 0.191 | 5.20E-01 | 0.00/0.13                    | rs12286037         | 0.008 | 4.00E-01 | 0.00/1.00 <sup>e</sup>       | rs12286037        | 0.058 | 4.50E-05 | 0.23/1.00                    |
|                | Metabochip        | rs189069311 | 0.043 | 4.16E-05 |                              | rs651821 (-3A>G)   | 0.274 | 4.41E-11 |                              | rs3741298         | 0.224 | 1.98E-05 |                              |
| <i>LCAT</i>    | GWAS              | rs16942887  | 0.214 | 3.47E-06 | 0.87/0.93                    | rs16942887         | 0.029 | 2.44E-01 | 0.57/0.82                    | rs16942887        | 0.152 | 2.21E-04 | 0.79/1.00                    |
|                | Metabochip        | rs255054    | 0.211 | 3.24E-07 |                              | rs12447119 (5'UTR) | 0.077 | 2.00E-04 |                              | rs1109166         | 0.192 | 5.00E-05 |                              |
| <i>APOB</i>    | GWAS              | rs1042034   | 0.158 | 7.47E-03 | 0.88/0.95                    | rs1042034          | 0.282 | 3.63E-03 | 0.19/1.00                    | rs1042034         | 0.258 | 4.95E-08 | 1.00/1.00                    |
|                | Metabochip        | rs10184054  | 0.158 | 3.11E-03 |                              | rs56984418         | 0.073 | 7.81E-05 |                              | rs2678379         | 0.258 | 4.28E-08 |                              |
| <i>LIPG</i>    | GWAS              | rs4939883   | 0.453 | 4.79E-01 | 0.04/0.57                    | rs4939883          | 0.177 | 5.89E-05 | 0.47/1.00                    | rs4939883         | 0.183 | 5.42E-05 | 0.64/1.00                    |
|                | Metabochip        | rs1016563   | 0.141 | 1.80E-04 |                              | rs1943973          | 0.178 | 1.90E-06 |                              | rs7244811         | 0.283 | 1.38E-05 |                              |
| <i>PPP1R3B</i> | GWAS              | rs9987289   | 0.184 | 2.48E-04 | 0.57/0.96                    | rs9987289          | 0.056 | 2.39E-01 | 0.24/0.67                    | rs9987289         | n.a.  | n.a.     | 0.40/0.74                    |
|                | Metabochip        | rs6601299   | 0.121 | 7.99E-08 |                              | rs7357361          | 0.032 | 2.55E-03 |                              | rs114798927       | 0.151 | 7.93E-05 |                              |
| <i>SCARB1</i>  | GWAS              | rs838880    | 0.325 | 4.29E-01 | 0.01/1.00                    | rs838880           | 0.478 | 1.61E-03 | 0.22/0.74                    | rs838880          | 0.407 | 5.68E-05 | 0.83/0.95                    |
|                | Metabochip        | rs116354593 | 0.016 | 9.20E-03 |                              | rs7977729          | 0.342 | 3.61E-04 |                              | rs838876          | 0.401 | 2.09E-05 |                              |
| <i>ARFGAP2</i> | GWAS              | rs3136441   | 0.034 | 7.31E-01 | 0.00/0.45                    | rs3136441          | 0.438 | 6.14E-01 | 0.02/0.65                    | rs3136441         | 0.219 | 1.14E-05 | 0.13/0.61                    |
|                | Metabochip        | rs901750    | 0.204 | 5.72E-04 |                              | rs4647756          | 0.058 | 2.09E-03 |                              | rs1055510         | 0.402 | 1.27E-06 |                              |
| <i>GALNT2</i>  | GWAS              | rs4846914   | 0.147 | 1.30E-01 | 0.00/0.31                    | rs4846914          | 0.248 | 4.91E-02 | 0.02/0.19                    | rs4846914         | 0.443 | 5.28E-04 | 1.00/1.00                    |
|                | Metabochip        | rs60506249  | 0.122 | 9.47E-03 |                              | rs78493600         | 0.100 | 4.99E-03 |                              | rs17315646        | 0.443 | 4.78E-04 |                              |
| <i>PLTP</i>    | GWAS              | rs6065906   | 0.162 | 1.90E-02 | 0.26/0.93                    | rs6065906          | 0.027 | 5.01E-01 | 0.00/0.15                    | rs6065906         | 0.169 | 6.55E-03 | n.a.                         |
|                | Metabochip        | rs4810479   | 0.397 | 9.50E-05 |                              | rs8114050          | 0.047 | 9.53E-04 |                              | rs6017720         | 0.156 | 3.74E-03 |                              |
| <i>LILRA3</i>  | GWAS              | rs386000    | 0.299 | 4.83E-01 | 0.00/0.98                    | rs386000           | 0.388 | 5.21E-01 | 0.03/0.20                    | rs386000          | 0.304 | 1.31E-04 | n.a.                         |
|                | Metabochip        | rs73055464  | 0.006 | 8.34E-04 |                              | rs434124           | 0.026 | 3.06E-02 |                              | rs798893          | 0.239 | 8.83E-05 |                              |
| <i>MMAB</i>    | GWAS              | rs9943753   | 0.080 | 8.70E-01 | 0.00/0.02                    | rs9943753          | 0.441 | 6.47E-02 | 0.65/1.00                    | rs9943753         | 0.428 | 3.94E-01 | 0.10/1.00                    |
|                | Metabochip        | rs111273776 | 0.062 | 2.33E-03 |                              | rs3815575          | 0.257 | 6.40E-04 |                              | rs2287182         | 0.051 | 9.68E-03 |                              |
| <i>FADS3</i>   | GWAS              | rs174546    | 0.084 | 1.25E-01 | 0.01/0.65                    | rs174546           | 0.384 | 3.68E-02 | 0.15/0.54                    | rs174546          | 0.408 | 2.75E-02 | 0.25/0.90                    |
|                | Metabochip        | rs11230827  | 0.196 | 4.18E-04 |                              | rs1534842          | 0.336 | 3.09E-03 |                              | rs174602          | 0.203 | 4.49E-03 |                              |
| <i>COBLL1</i>  | GWAS              | rs12328675  | 0.159 | 4.03E-01 | 0.00/0.76                    | rs12328675         | 0.003 | 9.91E-01 | 0.00/1.00                    | rs12328675        | 0.097 | 9.96E-04 | n.a.                         |
|                | Metabochip        | rs58133528  | 0.025 | 1.83E-02 |                              | rs34309702         | 0.022 | 1.09E-01 |                              | rs190303539       | 0.349 | 8.47E-05 |                              |
| <i>TTC39B</i>  | GWAS              | rs581080    | 0.498 | 3.55E-01 | 0.07/0.95                    | rs581080           | 0.107 | 5.38E-01 | 0.00/1.00                    | rs581080          | 0.150 | 8.30E-02 | 0.71/1.00                    |
|                | Metabochip        | rs189682870 | 0.072 | 1.39E-03 |                              | rs117901166        | 0.005 | 1.01E-02 |                              | rs686030          | 0.122 | 1.69E-03 |                              |
| <i>STARD3</i>  | GWAS              | rs11869286  | 0.260 | 6.86E-01 | 0.03/0.93                    | rs11869286         | 0.368 | 5.52E-02 | 0.12/0.69                    | rs11869286        | 0.314 | 3.31E-01 | 0.01/1.00                    |
|                | Metabochip        | rs78739040  | 0.076 | 3.47E-03 |                              | rs12150079         | 0.183 | 7.92E-03 |                              | rs117064469       | 0.007 | 7.78E-03 |                              |
| <i>LACTB</i>   | GWAS              | rs2652834   | 0.289 | 8.00E-01 | 0.07/0.93                    | rs2652834          | 0.011 | 7.10E-01 | 0.00/0.02                    | rs2652834         | 0.210 | 3.81E-03 | n.a.                         |
|                | Metabochip        | rs8036238   | 0.034 | 4.97E-03 |                              | rs76414746         | 0.007 | 5.33E-03 |                              | rs182185151       | 0.214 | 3.08E-03 |                              |
| <i>ABCA8</i>   | GWAS              | rs4148008   | 0.452 | 8.90E-01 | 0.01/0.89                    | rs4148008          | 0.439 | 2.01E-01 | 0.01/1.00                    | rs4148008         | 0.321 | 1.31E-01 | 0.12/0.74                    |
|                | Metabochip        | rs116585097 | 0.014 | 4.92E-03 |                              | rs117047167        | 0.009 | 5.17E-03 |                              | rs4968962         | 0.235 | 1.99E-02 |                              |
| <i>HNF4A</i>   | GWAS              | rs1800961   | 0.008 | 1.23E-01 | 0.02/1.00                    | rs1800961          | 0.013 | 9.89E-01 | 0.02/0.94                    | rs1800961         | 0.045 | 2.02E-02 | same                         |
|                | Metabochip        | rs6093978   | 0.284 | 3.35E-02 |                              | rs2273618          | 0.346 | 2.68E-01 |                              | rs1800961 (T139I) | 0.045 | 2.02E-02 |                              |

<sup>a</sup> LD ( $r^2/D'$ ) estimates were calculated from the genotype data of the PAGE African American samples, whose LD patterns may vary from any LD sources in 1000 Genomes Project

<sup>b</sup> LD ( $r^2/D'$ ) estimates were from the 1000 Genomes Project ANS samples, unless otherwise indicated

<sup>c</sup> LD ( $r^2/D'$ ) estimates were from the 1000 Genomes Project EUR samples

<sup>d</sup> Results of association with reported GWAS index SNPs were based on current study samples

<sup>e</sup> LD ( $r^2/D'$ ) estimates were calculated from the genotype data of the CLHNS samples, due to the SNPs are not in 1000 Genomes Project

n.a. the pairwise LD estimates are not applicable

**Table S3C. Lead SNP at LDL-C loci within each ancestry group and their relative significance compared to reported GWAS index SNPs**

| <i>LDL-C</i><br><i>Locus</i> | <b>African American</b> |                    |            |          |                                             | <b>East Asian</b> |            |          |                                             | <b>European</b>   |            |          |                                             |
|------------------------------|-------------------------|--------------------|------------|----------|---------------------------------------------|-------------------|------------|----------|---------------------------------------------|-------------------|------------|----------|---------------------------------------------|
|                              |                         | <b>Index SNP</b>   | <b>MAF</b> | <b>P</b> | <b>LD (<math>r^2/D'</math>)<sup>a</sup></b> | <b>Index SNP</b>  | <b>MAF</b> | <b>P</b> | <b>LD (<math>r^2/D'</math>)<sup>b</sup></b> | <b>Index SNP</b>  | <b>MAF</b> | <b>P</b> | <b>LD (<math>r^2/D'</math>)<sup>c</sup></b> |
| <i>APOE</i>                  | GWAS                    | rs4420638          | 0.182      | 2.50E-01 | 0.00/0.01                                   | rs4420638         | n.a.       | n.a.     | 0.01/1.00                                   | rs4420638         | 0.227      | 2.03E-17 | 0.01/0.89                                   |
|                              | MetaboChip              | rs7412 (R176C)     | 0.110      | 6.67E-75 |                                             | rs7412 (R176C)    | 0.086      | 1.10E-64 |                                             | rs7412 (R176C)    | 0.056      | 5.44E-76 |                                             |
| <i>LDLR</i>                  | GWAS                    | rs6511720          | 0.131      | 5.38E-14 | 0.63/0.95                                   | rs6511720         | 0.019      | 3.18E-02 | 0.11/0.94                                   | rs6511720         | 0.104      | 5.32E-22 | 0.58/1.00                                   |
|                              | MetaboChip              | rs73015011         | 0.180      | 5.70E-16 |                                             | rs11668477        | 0.142      | 2.37E-04 |                                             | rs112898275       | 0.104      | 8.91E-23 |                                             |
| <i>SORT1</i>                 | GWAS                    | rs629301           | 0.350      | 9.00E-12 | 0.62/1.00                                   | rs629301          | 0.038      | 3.08E-01 | 0.03/0.28                                   | rs629301          | 0.228      | 1.82E-21 | 0.90/1.00                                   |
|                              | MetaboChip              | rs12740374         | 0.247      | 1.45E-18 |                                             | rs676961          | 0.047      | 6.88E-03 |                                             | rs602633          | 0.230      | 2.08E-22 |                                             |
| <i>PCSK9</i>                 | GWAS                    | rs2479409          | 0.261      | 1.19E-01 | 0.02/0.93                                   | rs2479409         | 0.432      | 1.36E-02 | 0.03/1.00                                   | rs2479409         | 0.310      | 1.55E-04 | 0.00/0.21                                   |
|                              | MetaboChip              | rs28362286 (C679X) | 0.009      | 4.14E-22 |                                             | rs2495488         | 0.068      | 7.19E-04 |                                             | rs11591147 (R46L) | 0.040      | 2.76E-30 |                                             |
| <i>APOB</i>                  | GWAS                    | rs1367117 (T98I)   | 0.115      | 3.78E-03 | 0.15/0.92                                   | rs1367117 (T98I)  | 0.127      | 2.90E-02 | 0.72/0.92                                   | rs1367117 (T98I)  | 0.284      | 5.72E-14 | 0.82/0.92                                   |
|                              | MetaboChip              | rs568938           | 0.426      | 1.14E-08 |                                             | rs2115838         | 0.135      | 7.60E-04 |                                             | rs934198          | 0.298      | 3.71E-17 |                                             |
| <i>ABO</i>                   | GWAS                    | rs635634           | 0.107      | 1.10E-03 | 0.00/1.00                                   | rs635634          | 0.166      | 1.28E-04 | 0.74/0.93                                   | rs635634          | 0.197      | 2.53E-05 | 0.44/0.79                                   |
|                              | MetaboChip              | rs9411508          | 0.011      | 7.21E-05 |                                             | rs9411476         | 0.162      | 1.08E-08 |                                             | rs9411378         | 0.301      | 4.06E-06 |                                             |
| <i>ABCG8</i>                 | GWAS                    | rs4299376          | 0.182      | 1.42E-02 | 0.16/0.67                                   | rs4299376         | 0.004      | 4.77E-01 | 0.00/1.00                                   | rs4299376         | 0.211      | 1.28E-05 | 0.05/1.00                                   |
|                              | MetaboChip              | rs72796798         | 0.071      | 2.24E-06 |                                             | rs4148217 (K400R) | 0.002      | 4.17E-02 |                                             | rs76866386        | 0.081      | 1.58E-07 |                                             |
| <i>HMGR</i>                  | GWAS                    | rs12916            | 0.247      | 5.40E-01 | 0.00/0.04                                   | rs12916           | 0.465      | 2.03E-01 | 0.31/0.92                                   | rs12916           | 0.445      | 4.00E-08 | same                                        |
|                              | MetaboChip              | rs6453134          | 0.302      | 3.19E-03 |                                             | rs253392          | 0.287      | 1.62E-03 |                                             | rs12916 (3'UTR)   | 0.445      | 4.00E-08 |                                             |
| <i>HPR</i>                   | GWAS                    | rs2000999          | 0.072      | 6.88E-01 | 0.01/0.49                                   | rs2000999         | 0.264      | 7.68E-01 | 0.61/0.90 <sup>e</sup>                      | rs2000999         | 0.190      | 3.71E-06 | 1.00/1.00                                   |
|                              | MetaboChip              | rs1862752          | 0.285      | 1.79E-07 |                                             | rs182238023       | 0.328      | 2.19E-04 |                                             | rs34042070        | 0.190      | 1.59E-06 |                                             |
| <i>TRIB1</i>                 | GWAS                    | rs2954029          | 0.350      | 7.39E-01 | 0.05/0.87                                   | rs2954029         | 0.447      | 6.04E-02 | 0.31/0.93                                   | rs2954029         | 0.466      | 1.77E-04 | 0.04/0.60                                   |
|                              | MetaboChip              | rs2980888          | 0.107      | 1.34E-04 |                                             | rs10216723        | 0.439      | 1.45E-02 |                                             | rs4419828         | 0.267      | 1.11E-04 |                                             |
| <i>TIMD4</i>                 | GWAS                    | rs6882076          | 0.374      | 4.41E-01 | 0.15/0.98                                   | rs6882076         | 0.350      | 4.42E-02 | 0.11/1.00                                   | rs6882076         | 0.325      | 1.64E-04 | n.a.                                        |
|                              | MetaboChip              | rs10075548         | 0.199      | 3.85E-03 |                                             | rs72052548        | 0.069      | 2.78E-03 |                                             | rs2862716 (M158T) | 0.333      | 1.14E-04 |                                             |
| <i>TOP1</i>                  | GWAS                    | rs2902940          | 0.489      | 4.58E-01 | 0.00/0.06                                   | rs2902940         | 0.290      | 6.12E-01 | 0.01/0.73 <sup>e</sup>                      | rs2902940         | 0.764      | 1.35E-01 | 0.00/0.62                                   |
|                              | MetaboChip              | rs6065326          | 0.094      | 1.02E-02 |                                             | rs78886984        | 0.060      | 1.58E-02 |                                             | rs1883511         | 0.022      | 1.50E-05 |                                             |
| <i>LDLRAP1</i>               | GWAS                    | rs12027135         | 0.460      | 4.78E-02 | 0.02/0.96                                   | rs12027135        | 0.146      | 2.24E-01 | 0.63/0.90                                   | rs12027135        | 0.460      | 8.80E-02 | 0.76/0.96                                   |
|                              | MetaboChip              | rs3093590          | 0.020      | 1.89E-04 |                                             | rs35447638        | 0.220      | 2.36E-03 |                                             | rs706845          | 0.352      | 1.77E-02 |                                             |
| <i>CILP2</i>                 | GWAS                    | rs10401969         | 0.268      | 1.38E-01 | 0.00/1.00                                   | rs10401969        | 0.049      | 1.53E-01 | 0.00/1.00                                   | rs10401969        | 0.068      | 1.17E-03 | 0.64/0.80                                   |
|                              | MetaboChip              | rs78712672         | 0.015      | 6.51E-03 |                                             | rs149298732       | 0.045      | 1.70E-02 |                                             | rs58489806        | 0.083      | 2.78E-04 |                                             |
| <i>SLC22A1</i>               | GWAS                    | rs1564348          | 0.110      | 5.80E-01 | 0.00/0.32                                   | rs1564348         | 0.002      | 9.52E-01 | n.a.                                        | rs1564348         | 0.145      | 3.24E-02 | 0.00/0.05                                   |
|                              | MetaboChip              | rs9456502          | 0.187      | 3.97E-04 |                                             | rs9457839         | 0.121      | 2.00E-03 |                                             | rs3798179         | 0.365      | 5.71E-03 |                                             |
| <i>MAFB</i>                  | GWAS                    | rs2902940          | 0.489      | 4.58E-01 | 0.02/1.00                                   | rs2902940         | 0.248      | 3.57E-01 | 0.01/1.00                                   | rs2902940         | 0.236      | 1.35E-01 | 0.00/0.05                                   |
|                              | MetaboChip              | rs76897158         | 0.018      | 1.68E-02 |                                             | rs77016819        | 0.017      | 2.75E-03 |                                             | rs2865162         | 0.109      | 6.01E-02 |                                             |
| <i>ST3GAL4</i>               | GWAS                    | rs11220462         | 0.046      | 8.61E-01 | 0.00/0.21                                   | rs11220462        | 0.355      | 6.17E-01 | n.a.                                        | rs11220462        | n.a.       | n.a.     | 0.01/1.00                                   |
|                              | MetaboChip              | rs7937122          | 0.381      | 4.54E-03 |                                             | rs12281220        | 0.003      | 4.73E-02 |                                             | rs117603193       | 0.037      | 1.22E-02 |                                             |
| <i>MYLIP</i>                 | GWAS                    | rs3757354          | 0.335      | 1.77E-01 | 0.01/0.80                                   | rs3757354         | 0.359      | 3.24E-01 | 0.40/1.00                                   | rs3757354         | 0.260      | 7.72E-01 | 0.50/1.00                                   |
|                              | MetaboChip              | rs116738939        | 0.020      | 9.04E-03 |                                             | rs1011616         | 0.419      | 2.83E-02 |                                             | rs72833416        | 0.072      | 1.64E-01 |                                             |

<sup>a</sup> LD ( $r^2/D'$ ) estimates were calculated from the genotype data of the PAGE African American samples, whose LD patterns may vary from any LD sources in 1000 Genomes Project

<sup>b</sup> LD ( $r^2/D'$ ) estimates were from the 1000 Genomes Project ASN samples, unless otherwise indicated

<sup>c</sup> LD ( $r^2/D'$ ) estimates were from the 1000 Genomes Project EUR samples, unless otherwise indicated

<sup>d</sup> Results of association with reported GWAS index SNPs were based on current study samples

<sup>e</sup> LD ( $r^2/D'$ ) estimates were calculated from the genotype data of the CLHNS samples, due to the SNPs are not in 1000 Genomes Project

n.a. the pairwise LD estimates are not applicable
