# Supplementary material for: Trans-Ethnic Fine-Mapping of Lipid Loci Identifies Population-Specific Signals and Allelic Heterogeneity That Increases the Trait Variance Explained
Source: PubMed Central journal article supplement (PMC3605054; doi:10.1371/journal.pgen.1003379), 2013-03-21
Supplement: pgen.1003379.s010.pdf [file pgen.1003379.s010.pdf]

**Table S4A. SNPs with the strongest association at TG loci in combined trans-ethnic meta-analysis and their associations within ancestry groups**

| <i>Locus</i>   | SNP                | A1/A2 | Trans-ethnic meta-analysis |               |       |                |              |                   |         |         | African American |               |       |                | East Asian |               |       |                | European |               |       |                |
|----------------|--------------------|-------|----------------------------|---------------|-------|----------------|--------------|-------------------|---------|---------|------------------|---------------|-------|----------------|------------|---------------|-------|----------------|----------|---------------|-------|----------------|
|                |                    |       | EAF                        | beta          | SE    | <i>P</i>       | Direction    | HetI <sup>2</sup> | HetP    | Total N | EAF              | beta          | SE    | <i>P</i>       | EAF        | beta          | SE    | <i>P</i>       | EAF      | beta          | SE    | <i>P</i>       |
| <i>APOA5</i>   | rs662799 (5'UTR)   | A/G   | 0.807                      | <b>-0.122</b> | 0.006 | <b>2.5E-91</b> | -----        | 82.4              | 1.5E-08 | 26232   | 0.880            | <b>-0.045</b> | 0.013 | <b>3.4E-04</b> | 0.722      | <b>-0.141</b> | 0.008 | <b>6.1E-65</b> | 0.921    | <b>-0.151</b> | 0.012 | <b>9.3E-36</b> |
| <i>GCKR</i>    | rs1260326 (L446P)  | T/C   | 0.368                      | <b>0.063</b>  | 0.005 | <b>1.6E-42</b> | +++++        | 0                 | 0.72    | 26226   | 0.149            | <b>0.065</b>  | 0.012 | <b>2.2E-08</b> | 0.484      | <b>0.056</b>  | 0.008 | <b>1.5E-13</b> | 0.350    | <b>0.069</b>  | 0.007 | <b>4.4E-24</b> |
| <i>LPL</i>     | rs13702 (3'UTR)    | T/C   | 0.673                      | <b>0.054</b>  | 0.005 | <b>6.4E-29</b> | +++++        | 1.9               | 0.42    | 26234   | 0.492            | <b>0.044</b>  | 0.008 | <b>6.8E-08</b> | 0.813      | <b>0.055</b>  | 0.010 | <b>2.1E-08</b> | 0.741    | <b>0.060</b>  | 0.007 | <b>4.2E-16</b> |
| <i>TRIB1</i>   | rs2980888          | T/C   | 0.248                      | <b>0.048</b>  | 0.005 | <b>7.7E-21</b> | +++++        | 58.2              | 7.8E-03 | 26209   | 0.109            | <b>0.061</b>  | 0.013 | <b>5.3E-06</b> | 0.277      | <b>0.035</b>  | 0.008 | <b>3.4E-05</b> | 0.268    | <b>0.054</b>  | 0.007 | <b>2.4E-13</b> |
| <i>APOC1</i>   | rs12721054 (3'UTR) | A/G   | 0.881                      | <b>0.113</b>  | 0.013 | <b>3.6E-19</b> | +++++?????   | 0                 | 0.71    | 6544    | 0.881            | <b>0.113</b>  | 0.013 | <b>3.6E-19</b> | n.a.       | n.a.          | n.a.  | n.a.           | n.a.     | n.a.          | n.a.  | n.a.           |
| <i>MLXIPL</i>  | rs6968170          | A/G   | 0.202                      | <b>-0.045</b> | 0.006 | <b>7.5E-16</b> | -----        | 37.6              | 0.10    | 26194   | 0.191            | <b>-0.027</b> | 0.011 | <b>1.1E-02</b> | 0.089      | <b>-0.085</b> | 0.013 | <b>2.6E-10</b> | 0.245    | <b>-0.042</b> | 0.008 | <b>3.4E-08</b> |
| <i>ANGPTL3</i> | rs10889333         | A/G   | 0.284                      | <b>-0.038</b> | 0.005 | <b>8.4E-16</b> | -----        | 40.4              | 7.9E-02 | 26188   | 0.348            | <b>-0.027</b> | 0.009 | <b>1.7E-03</b> | 0.211      | <b>-0.034</b> | 0.009 | <b>2.3E-04</b> | 0.281    | <b>-0.049</b> | 0.007 | <b>1.4E-11</b> |
| <i>APOB</i>    | rs676210 (P2739L)  | A/G   | 0.399                      | <b>-0.031</b> | 0.005 | <b>6.3E-10</b> | -----+-----  | 68.9              | 3.7E-04 | 26232   | 0.157            | <b>-0.052</b> | 0.011 | <b>4.0E-06</b> | 0.722      | <b>0.002</b>  | 0.009 | <b>7.9E-01</b> | 0.260    | <b>-0.047</b> | 0.007 | <b>2.1E-10</b> |
| <i>LIPC</i>    | rs10468017         | T/C   | 0.254                      | <b>0.023</b>  | 0.005 | <b>5.5E-06</b> | +-----+----- | 52.9              | 2.0E-02 | 26173   | 0.161            | <b>0.032</b>  | 0.011 | <b>4.0E-03</b> | 0.182      | <b>-0.002</b> | 0.010 | <b>8.0E-01</b> | 0.328    | <b>0.033</b>  | 0.007 | <b>3.0E-06</b> |
| <i>CETP</i>    | rs11076175         | A/G   | 0.813                      | <b>-0.024</b> | 0.006 | <b>2.3E-05</b> | -----        | 0                 | 0.82    | 26081   | 0.752            | <b>-0.012</b> | 0.010 | <b>2.0E-01</b> | 0.875      | <b>-0.022</b> | 0.011 | <b>5.1E-02</b> | 0.825    | <b>-0.033</b> | 0.009 | <b>1.0E-04</b> |
| <i>NAT2</i>    | rs4921911          | T/C   | 0.346                      | <b>-0.018</b> | 0.005 | <b>4.3E-05</b> | -----        | 0                 | 0.85    | 26234   | 0.325            | <b>-0.010</b> | 0.009 | <b>2.5E-01</b> | 0.424      | <b>-0.026</b> | 0.008 | <b>7.4E-04</b> | 0.292    | <b>-0.018</b> | 0.007 | <b>1.5E-02</b> |
| <i>KLHL8</i>   | rs11097129         | A/G   | 0.777                      | <b>0.020</b>  | 0.006 | <b>5.0E-04</b> | +++++        | 0                 | 0.99    | 26228   | 0.943            | <b>0.013</b>  | 0.018 | <b>4.8E-01</b> | 0.779      | <b>0.014</b>  | 0.009 | <b>1.4E-01</b> | 0.746    | <b>0.024</b>  | 0.008 | <b>1.3E-03</b> |
| <i>PINX1</i>   | rs10088387         | T/G   | 0.973                      | <b>-0.089</b> | 0.026 | <b>6.2E-04</b> | +----??????? | 30                | 0.22    | 6551    | 0.973            | <b>-0.089</b> | 0.026 | <b>6.2E-04</b> | n.a.       | n.a.          | n.a.  | n.a.           | n.a.     | n.a.          | n.a.  | n.a.           |
| <i>TYW1B</i>   | rs114204448        | T/C   | 0.020                      | <b>0.106</b>  | 0.032 | <b>9.0E-04</b> | +++++??????? | 19.4              | 0.29    | 5405    | 0.020            | <b>0.106</b>  | 0.032 | <b>9.0E-04</b> | n.a.       | n.a.          | n.a.  | n.a.           | n.a.     | n.a.          | n.a.  | n.a.           |
| <i>chr12</i>   | rs10735872         | T/C   | 0.087                      | <b>0.050</b>  | 0.016 | <b>1.8E-03</b> | +++~???????  | 33.9              | 0.21    | 5316    | 0.087            | <b>0.050</b>  | 0.016 | <b>1.8E-03</b> | n.a.       | n.a.          | n.a.  | n.a.           | n.a.     | n.a.          | n.a.  | n.a.           |
| <i>MAP3K1</i>  | rs3936510          | T/G   | 0.170                      | <b>0.018</b>  | 0.006 | <b>2.7E-03</b> | +++++        | 40.4              | 7.9E-02 | 26233   | 0.234            | <b>0.008</b>  | 0.010 | <b>4.2E-01</b> | 0.113      | <b>0.013</b>  | 0.012 | <b>3.0E-01</b> | 0.143    | <b>0.030</b>  | 0.009 | <b>1.4E-03</b> |
| <i>CAPN3</i>   | rs117264272        | A/G   | 0.995                      | <b>-0.196</b> | 0.068 | <b>3.9E-03</b> | ----~??????? | 0                 | 0.77    | 7114    | 0.995            | <b>-0.179</b> | 0.070 | <b>1.0E-02</b> | 0.991      | <b>-0.475</b> | 0.286 | <b>9.7E-02</b> | n.a.     | n.a.          | n.a.  | n.a.           |
| <i>KLF12</i>   | rs73526970         | A/G   | 0.117                      | <b>0.027</b>  | 0.013 | <b>3.8E-02</b> | +----+?+?+~? | 0                 | 0.76    | 15617   | 0.117            | <b>0.027</b>  | 0.013 | <b>3.6E-02</b> | n.a.       | n.a.          | n.a.  | n.a.           | n.a.     | n.a.          | n.a.  | n.a.           |

A1/A2: effect allele/non-effect allele

EAF: effect allele (A1) frequency

HetI<sup>2</sup>: I<sup>2</sup> statistic which measures heterogeneity on scale of 0-100%

HetP: *P* values for heterogeneity across the 11 cohorts (exhibited in Table S1) included in meta-analysis

**Table S4B. SNPs with the strongest association at HDL-C loci in combined trans-ethnic meta-analysis and their associations within ancestry groups**

| <i>Locus</i>   | SNP                | A1/A2 | EAF   | Trans-ethnic meta-analysis |       |                 |           |                   |         |         | African American |               |       |                | East Asian |               |       |                | European |               |       |                |
|----------------|--------------------|-------|-------|----------------------------|-------|-----------------|-----------|-------------------|---------|---------|------------------|---------------|-------|----------------|------------|---------------|-------|----------------|----------|---------------|-------|----------------|
|                |                    |       |       | beta                       | SE    | <i>P</i>        | Direction | HetI <sup>2</sup> | HetP    | Total N | EAF              | beta          | SE    | <i>P</i>       | EAF        | beta          | SE    | <i>P</i>       | EAF      | beta          | SE    | <i>P</i>       |
| <i>CETP</i>    | rs247616           | T/C   | 0.241 | <b>0.088</b>               | 0.004 | <b>7.0E-121</b> | +++++     | 50.2              | 0.028   | 25375   | 0.258            | <b>0.110</b>  | 0.008 | <b>3.0E-42</b> | 0.167      | <b>0.071</b>  | 0.007 | <b>1.9E-26</b> | 0.284    | <b>0.090</b>  | 0.006 | <b>6.2E-59</b> |
| <i>LIPC</i>    | rs1077834 (5'UTR)  | T/C   | 0.621 | <b>-0.041</b>              | 0.003 | <b>2.5E-33</b>  | -----     | 4.5               | 0.40    | 25378   | 0.481            | <b>-0.034</b> | 0.007 | <b>2.2E-06</b> | 0.598      | <b>-0.037</b> | 0.005 | <b>1.8E-13</b> | 0.751    | <b>-0.050</b> | 0.006 | <b>1.9E-17</b> |
| <i>LPL</i>     | rs10096633         | T/C   | 0.233 | <b>0.044</b>               | 0.005 | <b>2.8E-21</b>  | +++++     | 14.2              | 0.31    | 25383   | 0.421            | <b>0.051</b>  | 0.007 | <b>1.0E-12</b> | 0.091      | <b>0.038</b>  | 0.009 | <b>1.6E-05</b> | 0.101    | <b>0.040</b>  | 0.008 | <b>2.9E-06</b> |
| <i>ABCA1</i>   | rs1883025          | T/C   | 0.266 | <b>-0.031</b>              | 0.004 | <b>4.3E-17</b>  | -----     | 0                 | 0.63    | 25383   | 0.336            | <b>-0.018</b> | 0.008 | <b>1.8E-02</b> | 0.271      | <b>-0.037</b> | 0.006 | <b>3.7E-11</b> | 0.209    | <b>-0.032</b> | 0.006 | <b>4.5E-07</b> |
| <i>APOA5</i>   | rs662799 (5'UTR)   | A/G   | 0.790 | <b>0.033</b>               | 0.004 | <b>1.8E-14</b>  | +++++     | 34.2              | 0.13    | 25381   | 0.880            | <b>0.025</b>  | 0.011 | <b>2.4E-02</b> | 0.722      | <b>0.036</b>  | 0.006 | <b>8.0E-11</b> | 0.919    | <b>0.033</b>  | 0.009 | <b>4.7E-04</b> |
| <i>LCAT</i>    | rs3785100          | T/C   | 0.843 | <b>-0.032</b>              | 0.005 | <b>9.0E-12</b>  | -----     | 0                 | 0.55    | 25348   | 0.783            | <b>-0.043</b> | 0.009 | <b>6.5E-07</b> | 0.904      | <b>-0.028</b> | 0.009 | <b>1.7E-03</b> | 0.845    | <b>-0.027</b> | 0.007 | <b>1.6E-04</b> |
| <i>APOB</i>    | rs1042034 (S4338N) | T/C   | 0.552 | <b>-0.024</b>              | 0.004 | <b>1.1E-10</b>  | -----     | 26.3              | 0.19    | 25382   | 0.842            | <b>-0.026</b> | 0.010 | <b>7.5E-03</b> | 0.282      | <b>-0.016</b> | 0.006 | <b>3.6E-03</b> | 0.742    | <b>-0.032</b> | 0.006 | <b>4.9E-08</b> |
| <i>LIPG</i>    | rs1943973          | A/G   | 0.833 | <b>0.029</b>               | 0.005 | <b>2.7E-10</b>  | +++++     | 0                 | 0.75    | 25383   | 0.969            | <b>0.026</b>  | 0.021 | <b>2.1E-01</b> | 0.822      | <b>0.031</b>  | 0.007 | <b>1.9E-06</b> | 0.831    | <b>0.027</b>  | 0.007 | <b>6.9E-05</b> |
| <i>PPP1R3B</i> | rs6601299          | T/C   | 0.136 | <b>-0.034</b>              | 0.006 | <b>8.8E-10</b>  | -----     | 30.6              | 0.16    | 25376   | 0.121            | <b>-0.059</b> | 0.011 | <b>8.0E-08</b> | 0.052      | <b>-0.016</b> | 0.015 | <b>2.9E-01</b> | 0.160    | <b>-0.028</b> | 0.007 | <b>1.1E-04</b> |
| <i>SCARB1</i>  | rs921919           | A/G   | 0.466 | <b>-0.017</b>              | 0.003 | <b>4.0E-07</b>  | -----     | 27.9              | 0.18    | 25383   | 0.129            | <b>-0.002</b> | 0.011 | <b>8.7E-01</b> | 0.416      | <b>-0.018</b> | 0.005 | <b>3.7E-04</b> | 0.590    | <b>-0.020</b> | 0.005 | <b>9.7E-05</b> |
| <i>ARFGAP2</i> | rs326222           | T/C   | 0.570 | <b>0.018</b>               | 0.004 | <b>4.6E-07</b>  | +++++     | 32.7              | 0.14    | 25380   | 0.603            | <b>0.021</b>  | 0.007 | <b>4.0E-03</b> | 0.745      | <b>0.007</b>  | 0.006 | <b>2.4E-01</b> | 0.396    | <b>0.025</b>  | 0.006 | <b>3.6E-06</b> |
| <i>GALNT2</i>  | rs10127775         | A/T   | 0.600 | <b>-0.018</b>              | 0.004 | <b>3.5E-06</b>  | ---+?     | 69.1              | 6.2E-04 | 23664   | 0.853            | <b>-0.016</b> | 0.011 | <b>1.4E-01</b> | 0.782      | <b>-0.019</b> | 0.007 | <b>6.2E-03</b> | 0.443    | <b>-0.018</b> | 0.005 | <b>5.4E-04</b> |
| <i>PLTP</i>    | rs6130969          | T/G   | 0.074 | <b>-0.038</b>              | 0.008 | <b>6.0E-06</b>  | -----?    | 0                 | 0.76    | 19261   | 0.088            | <b>-0.045</b> | 0.013 | <b>3.6E-04</b> | 0.099      | <b>-0.021</b> | 0.016 | <b>1.9E-01</b> | 0.028    | <b>-0.044</b> | 0.016 | <b>5.5E-03</b> |
| <i>LILRA3</i>  | rs103294           | T/C   | 0.247 | <b>0.021</b>               | 0.005 | <b>8.4E-06</b>  | +++++     | 0                 | 0.77    | 19261   | 0.092            | <b>0.024</b>  | 0.012 | <b>5.2E-02</b> | 0.213      | <b>0.018</b>  | 0.011 | <b>1.2E-01</b> | 0.288    | <b>0.021</b>  | 0.006 | <b>2.1E-04</b> |
| <i>MMAB</i>    | rs3815575          | T/C   | 0.314 | <b>0.016</b>               | 0.004 | <b>1.5E-05</b>  | +++++     | 21.4              | 0.24    | 25372   | 0.540            | <b>0.012</b>  | 0.007 | <b>9.0E-02</b> | 0.257      | <b>0.020</b>  | 0.006 | <b>6.4E-04</b> | 0.205    | <b>0.014</b>  | 0.006 | <b>2.6E-02</b> |
| <i>FADS3</i>   | rs102275           | T/C   | 0.467 | <b>0.013</b>               | 0.003 | <b>1.2E-04</b>  | +++++     | 0                 | 0.63    | 25381   | 0.349            | <b>0.018</b>  | 0.008 | <b>1.8E-02</b> | 0.386      | <b>0.013</b>  | 0.006 | <b>2.4E-02</b> | 0.590    | <b>0.011</b>  | 0.005 | <b>3.1E-02</b> |
| <i>COBLL1</i>  | rs12692737         | A/C   | 0.381 | <b>0.015</b>               | 0.004 | <b>1.6E-04</b>  | +++++     | 0                 | 0.77    | 25227   | 0.636            | <b>0.010</b>  | 0.007 | <b>1.8E-01</b> | 0.069      | <b>0.008</b>  | 0.010 | <b>4.2E-01</b> | 0.340    | <b>0.020</b>  | 0.005 | <b>2.3E-04</b> |
| <i>TTC39B</i>  | rs2185938          | A/G   | 0.903 | <b>0.020</b>               | 0.006 | <b>9.8E-04</b>  | +++++     | 23.8              | 0.22    | 25380   | 0.882            | <b>0.018</b>  | 0.011 | <b>1.0E-01</b> | 0.971      | <b>0.004</b>  | 0.015 | <b>7.9E-01</b> | 0.894    | <b>0.026</b>  | 0.008 | <b>1.7E-03</b> |
| <i>STARD3</i>  | rs12150079         | A/G   | 0.256 | <b>0.013</b>               | 0.004 | <b>9.9E-04</b>  | +++++     | 34.1              | 0.13    | 25371   | 0.084            | <b>0.019</b>  | 0.013 | <b>1.5E-01</b> | 0.183      | <b>0.017</b>  | 0.007 | <b>7.9E-03</b> | 0.337    | <b>0.009</b>  | 0.005 | <b>9.2E-02</b> |
| <i>LACTB</i>   | rs185973484        | T/C   | 0.291 | <b>0.022</b>               | 0.007 | <b>1.3E-03</b>  | ??+???    | 0                 | 0.87    | 13450   | 0.233            | <b>0.023</b>  | 0.016 | <b>1.5E-01</b> | n.a.       | n.a.          | n.a.  | n.a.           | 0.303    | <b>0.022</b>  | 0.008 | <b>4.2E-03</b> |
| <i>ABCA8</i>   | rs116585097        | A/G   | 0.014 | <b>-0.086</b>              | 0.031 | <b>4.9E-03</b>  | -+---?    | 0                 | 0.75    | 6742    | 0.014            | <b>-0.086</b> | 0.031 | <b>4.9E-03</b> | n.a.       | n.a.          | n.a.  | n.a.           | n.a.     | n.a.          | n.a.  | n.a.           |
| <i>HNF4A</i>   | rs1800961 (T139I)  | T/C   | 0.036 | <b>-0.024</b>              | 0.010 | <b>2.1E-02</b>  | -----?    | 0                 | 0.62    | 24235   | 0.008            | <b>-0.072</b> | 0.046 | <b>1.2E-01</b> | 0.013      | <b>0.000</b>  | 0.022 | <b>9.9E-01</b> | 0.045    | <b>-0.029</b> | 0.012 | <b>2.0E-02</b> |

A1/A2: effect allele/non-effect allele

EAF: effect allele (A1) frequency

HetI<sup>2</sup>: I<sup>2</sup> statistic which measures heterogeneity on scale of 0-100%

HetP: *P* values for heterogeneity across the 11 cohorts (exhibited in Table S1) included in meta-analysis

Table S4C. SNPs with the strongest association at LDL-C loci in combined trans-ethnic meta-analysis and their associations within ancestry groups

| Locus          | SNP               | A1/A2 | MAF   | Trans-ethnic meta-analysis |       |                 |           |                   |         |         | African American |               |       |                | East Asian |               |       |                | European |               |       |                |
|----------------|-------------------|-------|-------|----------------------------|-------|-----------------|-----------|-------------------|---------|---------|------------------|---------------|-------|----------------|------------|---------------|-------|----------------|----------|---------------|-------|----------------|
|                |                   |       |       | beta                       | SE    | P               | Direction | HetI <sup>2</sup> | HetP    | Total N | MAF              | beta          | SE    | P              | MAF        | beta          | SE    | P              | MAF      | beta          | SE    | P              |
| <i>APOE</i>    | rs7412 (R176C)    | T/C   | 0.083 | <b>-0.476</b>              | 0.015 | <b>5.9E-209</b> | -----     | 69.7              | 2.7E-04 | 24010   | 0.110            | <b>-0.536</b> | 0.026 | <b>6.7E-75</b> | 0.086      | <b>-0.411</b> | 0.024 | <b>1.1E-64</b> | 0.056    | <b>-0.505</b> | 0.027 | <b>5.4E-76</b> |
| <i>LDLR</i>    | rs73015011        | T/C   | 0.872 | <b>0.195</b>               | 0.015 | <b>7.4E-38</b>  | +++++     | 0                 | 0.98    | 24145   | 0.820            | <b>0.194</b>  | 0.024 | <b>5.7E-16</b> | 0.987      | <b>0.140</b>  | 0.060 | <b>2.0E-02</b> | 0.896    | <b>0.202</b>  | 0.021 | <b>1.5E-22</b> |
| <i>SORT1</i>   | rs12740374        | T/G   | 0.208 | <b>-0.144</b>              | 0.011 | <b>7.6E-37</b>  | -----     | 62.6              | 2.9E-03 | 24162   | 0.247            | <b>-0.188</b> | 0.021 | <b>1.4E-18</b> | 0.060      | <b>-0.060</b> | 0.029 | <b>4.1E-02</b> | 0.228    | <b>-0.144</b> | 0.015 | <b>9.9E-22</b> |
| <i>PCSK9</i>   | rs11591147 (R46L) | T/G   | 0.039 | <b>-0.390</b>              | 0.033 | <b>4.6E-32</b>  | ---+???   | 0                 | 0.78    | 15329   | 0.003            | <b>-0.595</b> | 0.196 | <b>2.3E-03</b> | n.a.       | n.a.          | n.a.  | n.a.           | 0.040    | <b>-0.384</b> | 0.034 | <b>2.8E-30</b> |
| <i>APOB</i>    | rs7575840         | T/G   | 0.230 | <b>0.093</b>               | 0.010 | <b>4.2E-19</b>  | +++++     | 18.4              | 0.27    | 24143   | 0.150            | <b>0.065</b>  | 0.026 | <b>1.2E-02</b> | 0.136      | <b>0.063</b>  | 0.020 | <b>1.6E-03</b> | 0.298    | <b>0.115</b>  | 0.014 | <b>7.0E-17</b> |
| <i>ABO</i>     | rs2519093         | T/C   | 0.181 | <b>0.080</b>               | 0.011 | <b>2.2E-13</b>  | +++++     | 0                 | 0.91    | 24139   | 0.105            | <b>0.103</b>  | 0.030 | <b>6.6E-04</b> | 0.187      | <b>0.088</b>  | 0.018 | <b>5.3E-07</b> | 0.196    | <b>0.068</b>  | 0.016 | <b>1.7E-05</b> |
| <i>ABCG8</i>   | rs76866386        | T/C   | 0.924 | <b>0.116</b>               | 0.018 | <b>4.0E-11</b>  | +++++     | 0                 | 0.56    | 24162   | 0.909            | <b>0.133</b>  | 0.032 | <b>3.7E-05</b> | 0.976      | <b>0.052</b>  | 0.048 | <b>2.8E-01</b> | 0.919    | <b>0.122</b>  | 0.023 | <b>1.6E-07</b> |
| <i>HMGR</i>    | rs7722186         | A/G   | 0.522 | <b>0.046</b>               | 0.008 | <b>4.0E-08</b>  | +++++     | 0                 | 0.77    | 24162   | 0.608            | <b>0.051</b>  | 0.019 | <b>7.6E-03</b> | 0.571      | <b>0.032</b>  | 0.014 | <b>2.0E-02</b> | 0.443    | <b>0.056</b>  | 0.013 | <b>1.1E-05</b> |
| <i>HPR</i>     | rs72626182        | T/G   | 0.206 | <b>0.052</b>               | 0.011 | <b>2.0E-06</b>  | +++++     | 0                 | 0.48    | 24153   | 0.059            | <b>0.015</b>  | 0.040 | <b>7.0E-01</b> | 0.255      | <b>0.042</b>  | 0.016 | <b>8.1E-03</b> | 0.177    | <b>0.070</b>  | 0.017 | <b>2.4E-05</b> |
| <i>TRIB1</i>   | rs4870941         | C/G   | 0.228 | <b>0.047</b>               | 0.010 | <b>4.8E-06</b>  | +++++     | 13.3              | 0.32    | 24159   | 0.107            | <b>0.059</b>  | 0.030 | <b>4.9E-02</b> | 0.185      | <b>0.043</b>  | 0.018 | <b>1.8E-02</b> | 0.280    | <b>0.048</b>  | 0.014 | <b>6.4E-04</b> |
| <i>TIMD4</i>   | rs9715911         | A/G   | 0.640 | <b>0.040</b>               | 0.009 | <b>5.7E-06</b>  | +++++     | 0                 | 0.91    | 24162   | 0.461            | <b>0.024</b>  | 0.019 | <b>1.9E-01</b> | 0.704      | <b>0.039</b>  | 0.015 | <b>9.8E-03</b> | 0.681    | <b>0.049</b>  | 0.013 | <b>2.6E-04</b> |
| <i>TOP1</i>    | rs1883511         | A/C   | 0.980 | <b>0.187</b>               | 0.041 | <b>6.5E-06</b>  | +++++     | 34.3              | 0.12    | 24162   | 0.992            | <b>0.145</b>  | 0.107 | <b>1.8E-01</b> | n.a.       | n.a.          | n.a.  | n.a.           | 0.978    | <b>0.195</b>  | 0.045 | <b>1.5E-05</b> |
| <i>LDLRAP1</i> | rs35447638        | A/G   | 0.423 | <b>0.033</b>               | 0.009 | <b>1.8E-04</b>  | +++++     | 0                 | 0.95    | 24160   | 0.408            | <b>0.034</b>  | 0.019 | <b>6.6E-02</b> | 0.220      | <b>0.051</b>  | 0.017 | <b>2.4E-03</b> | 0.545    | <b>0.023</b>  | 0.013 | <b>7.4E-02</b> |
| <i>CILP2</i>   | rs17216525        | T/C   | 0.071 | <b>-0.055</b>              | 0.017 | <b>8.9E-04</b>  | +++++     | 50.8              | 0.026   | 24162   | 0.037            | <b>0.053</b>  | 0.049 | <b>2.8E-01</b> | 0.081      | <b>-0.058</b> | 0.025 | <b>1.9E-02</b> | 0.070    | <b>-0.081</b> | 0.025 | <b>1.3E-03</b> |
| <i>SLC22A1</i> | rs9457838         | A/G   | 0.094 | <b>-0.102</b>              | 0.032 | <b>1.5E-03</b>  | +++++     | 9.5               | 0.36    | 13556   | 0.094            | <b>-0.098</b> | 0.032 | <b>2.3E-03</b> | n.a.       | n.a.          | n.a.  | n.a.           | 0.0002   | <b>-0.018</b> | 0.011 | <b>9.1E-02</b> |
| <i>chr20</i>   | rs77016819        | T/G   | 0.017 | <b>-0.158</b>              | 0.053 | <b>2.8E-03</b>  | ?????     | 0                 | 0.76    | 7693    | n.a.             | <b>n.a.</b>   | n.a.  | n.a.           | 0.017      | <b>-0.158</b> | 0.053 | <b>2.8E-03</b> | n.a.     | n.a.          | n.a.  | n.a.           |
| <i>ST3GAL4</i> | rs114540788       | T/C   | 0.100 | <b>0.081</b>               | 0.031 | <b>8.2E-03</b>  | +++++     | 0                 | 0.47    | 13862   | 0.100            | <b>0.081</b>  | 0.031 | <b>8.7E-03</b> | n.a.       | n.a.          | n.a.  | n.a.           | n.a.     | n.a.          | n.a.  | n.a.           |
| <i>MYLIP</i>   | rs116738939       | T/C   | 0.020 | <b>-0.174</b>              | 0.067 | <b>9.0E-03</b>  | +++++     | 0                 | 0.48    | 6436    | 0.020            | <b>-0.174</b> | 0.067 | <b>9.0E-03</b> | n.a.       | n.a.          | n.a.  | n.a.           | n.a.     | n.a.          | n.a.  | n.a.           |

A1/A2: effect allele/non-effect allele

EAF: effect allele (A1) frequency

HetI<sup>2</sup>: I<sup>2</sup> statistic which measures heterogeneity on scale of 0-100%

HetP: P values for heterogeneity across the 11 cohorts (exhibited in Table S1) included in meta-analysis
