# Supplementary material for: Trans-Ethnic Fine-Mapping of Lipid Loci Identifies Population-Specific Signals and Allelic Heterogeneity That Increases the Trait Variance Explained
Source: PubMed Central journal article supplement (PMC3605054; doi:10.1371/journal.pgen.1003379), 2013-03-21
Supplement: pgen.1003379.s011.pdf [file pgen.1003379.s011.pdf]

**Table S5. LDL-C association with haplotypes consisting of the third (rs1038026) and the fourth (rs157588) signals at *TOMM40-APOE-APOC4* cluster**

| <b>rs1038026</b> | <b>rs157588</b> | <b>hap.freq</b> | <b>beta</b> | <b>SE</b> | <b>P.glm</b> |
|------------------|-----------------|-----------------|-------------|-----------|--------------|
| A                | A               | 0.187           | reference   | reference | reference    |
| G                | A               | 0.634           | -0.294      | 0.028     | 9.4E-26      |
| A                | G               | 0.170           | -0.229      | 0.036     | 1.5E-10      |
| G                | G               | 0.010           | -0.312      | 0.117     | 7.5E-03      |

The 'haplo.glm' function implemented in the 'haplo.stats' R package was used to calculate the coefficient  $\beta$  and  $P$ -value for each haplotype compared with the reference haplotype, which was set as the A-A (trait increasing-increasing) haplotype. The same covariates used for genotype analysis were applied in haplotype analysis. Haplotype analysis was performed in 5,593 unrelated African Americans from the PAGE consortium
